# Supplementary material for: A chimeric vector for dual use in cyanobacteria and Escherichia coli, tested with cystatin, a nonfluorescent reporter protein
Source: PeerJ. 2021 Nov 3;9:e12199. doi: 10.7717/peerj.12199 (PMC8571960; doi:10.7717/peerj.12199)
Supplement: Supplemental Information 7 — Raw data supporting Figure 2A. [file peerj-09-12199-s007.xlsx]

## Sheet: Growth_fluorescence curve
	FLUORESCENCE							A600
Hours after inoculation (hai)	EV	GFP	GFP-SD	GFP-EV				EV	GFP	SD
3.5	275.177	783.629	7.86294	508.452				0.137	0.069	0.007
4	272.399	662.979	16.77	390.58				0.258	0.138	0.010392
5	270.806	650.443	7.67413	379.637				0.387	0.198333	0.022121
6	265.209	639.348	21.3583	374.139				0.712	0.412	0.045431
6.5	268.456	683.43	16.9552	414.974				0.816	0.466667	0.02318
7.5	258.163	653.438	15.6976	395.275				1.176	0.695333	0.072858
8	253.631	660.931	31.395	407.3				1.789	1.057	0.057297
8.7	253.631	714.775	19.0022	461.145				2.345	1.47233	0.135975
24	258.459	989.702	9.66863	731.243				2.328	2.416	0.027713
	Here are average fluorescence values, calculated and listed in seperate sheets							Growth curve

## Sheet: 3.5 hai
	pMJc01-EV	pMJc01_L21_RBS*_GFPmut3b
lambda [nm]	EV	GFP1	GFP2	GFP2
505	194.674	310.047	308.435	306.958
505.5	199.318	323.89	321.095	318.647
506	203.759	337.364	333.667	330.342				A600 measurements
506.5	208.185	350.818	346.466	342.449				EV	GFP1	GFP2	GFP3
507	212.104	364.252	359.781	355.147				0.137	0.062	0.069	0.076
507.5	216.03	377.686	374.037	368.342
508	220.148	391.27	388.448	381.69					average	SD
508.5	224.308	404.381	402.651	395.083				EV	/	/
509	228.569	417.082	416.434	408.852				GFP	0.069	0.007
509.5	232.478	429.86	429.794	422.647
510	235.779	442.606	443.156	436.101
510.5	238.871	455.697	455.988	448.485				Fluorescence at 517.5 nm
511	241.708	468.524	468.507	459.756				EV	GFP1	GFP2	GFP3
511.5	244.2	480.359	480.182	470.764				275.177	562.788	563.163	553.253
512	246.528	491.367	491.301	481.851
512.5	248.705	501.686	501.943	492.747				Fluorescence at 517.5 nm					Since the A600 of GFP samples has not reaches 0.1 yet, they were measured at their density and fluorescence was multiplied by 1.4 to extrapolate to density of 0.1. EV was measured at 0.1.
513	251.586	511.565	511.66	503.152				EV	GFP1	GFP2	GFP3
513.5	255.164	520.844	521.526	512.464				275.177	787.904	788.428	774.554
514	258.747	529.232	530.399	520.799
514.5	262.086	536.439	538.29	528.177					average	SD
515	264.796	542.865	545.156	534.171				EV	/	/
515.5	266.941	548.853	550.258	539.309				GFP	783.629	7.86294
516	269.145	554.084	554.603	543.584
516.5	271.366	558.639	558.039	547.312
517	272.967	561.334	560.765	550.321
517.5	274.237	562.626	562.606	552.432
518	275.177	562.788	563.163	553.253
518.5	276.158	561.818	562.448	552.734
519	277.843	560.63	560.771	551.344
519.5	279.846	558.367	558.494	548.625
520	281.988	555.665	555.45	545.261
520.5	283.968	552.518	552.627	541.473
521	285.038	548.899	549.495	537.625
521.5	285.62	545.138	545.25	533.427
522	286.049	540.35	539.626	528.505
522.5	286.354	534.825	532.701	523.119
523	287.231	528.684	525.762	517.426
523.5	287.965	522.53	519.428	512.023
524	288.447	516.188	513.528	506.297
524.5	288.563	510.036	507.657	500.348
525	288.109	503.861	501.238	494.395
525.5	287.963	497.768	494.461	488.582
526	287.808	492.242	487.804	483.494
526.5	287.953	486.233	481.067	478.423
527	288.244	480.07	474.453	472.621
527.5	287.916	473.613	468.431	466.104
528	287.316	466.931	462.73	459.303
528.5	286.385	460.87	457.639	452.901
529	285.473	455.297	453.033	447.377
529.5	285.061	450.174	448.91	442.941
530	284.78	445.43	445.392	439.193

## Sheet: 4 hai
	pMJc01-EV	pMJc01_L21_RBS*_GFPmut3b
lambda [nm]	EV	GFP1	GFP2	GFP2
505	200.107	351.004	362.622	344.437
505.5	202.367	364.369	377.507	355.802
506	204.957	378.498	392.403	369.083				A600 measurements
506.5	208.35	394.024	408.167	384.812				EV	GFP1	GFP2	GFP3
507	212.486	410.437	424.666	401.806				0.258	0.15	0.132	0.132
507.5	216.754	427.514	442.459	419.356
508	220.841	445.05	461.137	436.708					average	SD
508.5	224.26	462.326	479.79	453.261				EV	/	/
509	227.217	479.692	497.642	469.719				GFP	0.138	0.0103923
509.5	230.074	496.146	514.818	486.197
510	232.661	511.486	531.867	503.103
510.5	235.279	526.872	548.905	519.977				Fluorescence at 517.5 nm
511	237.877	542.155	565.464	535.488				EV	GFP1	GFP2	GFP3
511.5	240.784	557.369	580.071	549.235				272.399	663.03	679.723	646.183
512	244.388	572	593.641	561.506
512.5	248.191	585.071	606.654	573.112					average	SD
513	251.75	597.551	619.88	584.692				EV	/	/
513.5	254.676	609.964	633.213	595.942				GFP	662.979	16.77
514	257.204	622.017	644.248	606.498
514.5	259.494	632.684	653.036	616.592
515	261.663	640.976	660.169	625.794
515.5	264.168	647.123	667.014	632.454
516	266.636	652.226	673.56	636.902
516.5	269.255	656.972	678.07	640.374
517	270.933	660.733	679.866	642.761
517.5	271.527	662.719	679.772	645.262
518	272.399	663.03	679.723	646.183
518.5	273.665	661.331	679.787	645.093
519	276.084	658.492	679.777	643.466
519.5	278.259	655.099	678.123	640.296
520	279.379	651.766	674.653	637.116
520.5	280.108	648.334	670.104	632.783
521	280.349	643.741	663.784	626.528
521.5	281.069	637.163	656.785	620.306
522	281.465	628.038	648.584	613.337
522.5	281.905	618.449	639.639	606.259
523	282.688	609.314	630.307	598.206
523.5	284.143	600.676	620.806	588.601
524	285.665	592.331	611.683	579.324
524.5	286.433	582.093	602.149	570.653
525	286.639	572.02	592.83	562.909
525.5	285.95	563.22	583.186	555.742
526	285.394	555.418	574.247	547.435
526.5	284.972	549.033	566.569	538.833
527	284.603	541.653	558.465	529.923
527.5	284.794	533.335	549.891	521.1
528	284.886	524.248	540.248	514.527
528.5	284.861	514.841	530.83	507.755
529	284.05	508.328	522.719	498.944
529.5	282.27	507.463	514.6	486.231
530	279.626	514.613	505.557	465.705
530.5	276.411	527.702	495.456	441.114
	FLUORESCENCE MEASUREMENTS AT A730=0.1

## Sheet: 5 hai
	pMJc01-EV	pMJc01_L21_RBS*_GFPmut3b
lambda [nm]	EV	GFP1	GFP2	GFP2
505	190.24	342.912	350.965	345.419
505.5	194.01	355.564	362.837	360.232
506	197.883	369.765	376.049	375.027				A600 measurements
506.5	201.845	386.213	392.043	390.374				EV	GFP1	GFP2	GFP3
507	205.401	402.531	409.055	406.323				0.387	0.175	0.201	0.219
507.5	208.893	418.211	426.371	422.993
508	212.668	433.7	443.416	440.222					average	SD
508.5	217.234	449.167	460.111	456.642				EV	/	/
509	222.047	465.635	477.162	472.776				GFP	0.198333	0.0221209
509.5	226.403	482.203	494.644	488.696
510	229.812	498.335	511.199	504.628
510.5	232.273	514.639	527.072	521.594				Fluorescence at 517.5 nm
511	234.639	529.653	542.222	537.892				EV	GFP1	GFP2	GFP3
511.5	237.208	543.752	556.622	553.432				270.806	642.488	657.801	651.039
512	240.214	557.116	571.803	567.672
512.5	243.522	569.44	586.08	579.913					average	SD
513	246.915	581.384	598.96	591.847				EV	/	/
513.5	250.249	591.675	610.447	603.234				GFP	650.443	7.67413
514	253.272	600.574	620.007	614.428
514.5	256.081	609.233	629.372	624.593
515	258.366	618.149	637.715	632.282
515.5	260.575	627.208	644.45	637.608
516	262.772	634.454	649.899	641.382
516.5	265.165	638.6	654.068	644.747
517	267.707	641.032	657.005	647.812
517.5	269.583	642.127	658.312	650.262
518	270.806	642.488	657.801	651.039
518.5	271.387	641.587	655.762	650.308
519	271.871	638.06	653.143	648.642
519.5	272.87	633.936	650.414	645.939
520	274.729	629.226	647.015	642.318
520.5	277.236	624.555	642.485	637.065
521	279.135	619.979	635.934	630.309
521.5	280.346	614.125	628.149	622.49
522	280.429	607.523	620.17	614.331
522.5	280.261	599.929	611.709	605.969
523	280.616	592.182	603.459	597.269
523.5	281.141	583.92	595.642	588.038
524	282.286	576.076	587.748	579.291
524.5	283.282	567.959	580.082	571.29
525	283.918	558.574	572.039	563.754
525.5	284.113	549.409	563.253	556.466
526	283.551	540.102	554.488	548.067
526.5	282.4	532.207	545.438	539.597
527	281.205	525.201	536.447	530.775
527.5	280.712	517.287	527.756	521.792
	FLUORESCENCE MEASUREMENTS AT A730=0.1

## Sheet: 6 hai
	No raw data was extracted - only fluorescence values at 518 nm were noted.
								A600 measurements
								EV	GFP1	GFP2	GFP3
								0.712	0.38	0.392	0.464
									average	SD
								EV	/	/
								GFP	0.412	0.0454313
								Fluorescence at 517.5 nm
								EV	GFP1	GFP2	GFP3
								265.209	635.285	662.446	620.314
									average	SD
								EV	/	/
								GFP	639.348	21.3583

## Sheet: 6.5 hai
	pMJc01-EV	pMJc01_L21_RBS*_GFPmut3b
lambda [nm]	EV	GFP1	GFP2	GFP2
505	195.941	363.021	354.016	376.916
505.5	201.444	372.508	371.071	389.726
506	206.215	384.611	387.887	404.018				A600 measurements
506.5	209.908	400.139	405.256	420.697				EV	GFP1	GFP2	GFP3
507	212.72	417.178	422.576	438.202				0.816	0.442	0.47	0.488
507.5	215.169	434.557	440.262	456.471
508	218.105	451.151	458.241	475.457					average	SD
508.5	221.386	468.297	475.499	494.888				EV	/	/
509	224.571	487.027	492.775	514.254				GFP	0.466667	0.0231805
509.5	227.397	505.64	509.754	532.783
510	230.032	523.799	526.657	550.136
510.5	233.111	539.699	543.529	567.591				Fluorescence at 517.5 nm
511	236.905	553.973	559.435	584.852				EV	GFP1	GFP2	GFP3
511.5	241.059	568.01	574.004	601.382				268.456	672.884	674.418	702.988
512	244.704	582.093	587.341	617.495
512.5	247.627	597.105	600.074	631.73					average	SD
513	250.152	611.462	612.719	645.156				EV	/	/
513.5	252.275	624.61	625.395	657.928				GFP	683.43	16.9552
514	254.266	635.765	637.164	668.813
514.5	256.383	644.507	647.164	678.487
515	258.612	651.734	655.883	685.857
515.5	260.915	657.649	662.137	691.279
516	263.199	663.07	666.776	696.391
516.5	265.11	667.793	669.789	700.295
517	266.545	670.811	671.537	703.197
517.5	267.641	672.479	673.364	704.344
518	268.456	672.884	674.418	702.988
518.5	269.432	672.03	674.425	701.231
519	270.873	669.874	672.437	698.481
519.5	272.902	666.085	668.051	695.183
520	275.394	661.533	662.244	691.303
520.5	277.263	656.18	655.216	685.631
521	278.078	649.703	647.605	679.363
521.5	278.099	641.76	639.131	672.434
522	278.02	632.758	630.552	664.664
522.5	278.51	623.886	621.909	657.029
523	279.375	615.375	614.142	647.641
523.5	280.115	606.7	606.911	636.932
524	280.209	597.515	599.547	626.038
524.5	279.966	587.509	591.394	614.282
525	280.332	577.677	581.558	604.156
525.5	280.867	569.138	571.797	594.497
526	281.283	560.675	562.797	584.463
526.5	280.809	552.358	554.357	575
527	279.431	543.468	546.179	565.002
527.5	278.34	534.071	536.715	555.71

## Sheet: 7.5 hai
	No raw data was extracted - only fluorescence values at 518 nm were noted.
								A600 measurements
								EV	GFP1	GFP2	GFP3
								1.176	0.637	0.672	0.777
									average	SD
								EV	/	/
								GFP	0.695333	0.0728583
								Fluorescence at 517.5 nm
								EV	GFP1	GFP2	GFP3
								258.163	640.716	670.981	648.616
									average	SD
								EV	/	/
								GFP	653.438	15.6976

## Sheet: 8 hai
	No raw data was extracted - only fluorescence values at 518 nm were noted.
								A600 measurements
								EV	GFP1	GFP2	GFP3
								1.785	0.994	1.071	1.106
									average	SD
								EV	/	/
								GFP	1.057	0.0572975
								Fluorescence at 517.5 nm
								EV	GFP1	GFP2	GFP3
								253.631	628.39	663.364	691.038
									average	SD
								EV	/	/
								GFP	660.931	31.395

## Sheet: 8.7 hai
	No raw data was extracted - only fluorescence values at 518 nm were noted.
								A600 measurements
								EV	GFP1	GFP2	GFP3
								2.345	1.323	1.505	1.589
									average	SD
								EV	/	/
								GFP	1.47233	0.135975
								Fluorescence at 517.5 nm
								EV	GFP1	GFP2	GFP3
								253.631	694.513	732.198	717.615
									average	SD
								EV	/	/
								GFP	714.775	19.0022

## Sheet: 24 hai
	No raw data was extracted - only fluorescence values at 518 nm were noted.
								A600 measurements
								EV	GFP1	GFP2	GFP3
								2.4	2.448	2.4	2.416
									average	SD
								EV	/	/
								GFP	2.42133	0.0244404
								Fluorescence at 517.5 nm
								EV	GFP1	GFP2	GFP3
								258.459	1000.05	980.897	988.161
									average	SD
								EV	/	/
								GFP	989.702	9.66863
