# Supplementary material for: A chimeric vector for dual use in cyanobacteria and Escherichia coli, tested with cystatin, a nonfluorescent reporter protein
Source: PeerJ. 2021 Nov 3;9:e12199. doi: 10.7717/peerj.12199 (PMC8571960; doi:10.7717/peerj.12199)
Supplement: Supplemental Information 8 — Raw data supporting Figure 2B. [file peerj-09-12199-s008.xlsx]

## Sheet: Growth_fluorescence curve
		FLUORESCENCE									A730
Days after inoculation (dai)	Date	EV	EV-SD	GFP	GFP-SD	GFP-EV	SD				EV	SD	GFP	SD
1	10.7.2018	34.5894	2.38515	182.596	23.6795	148.007	23.7993				0.067	0.014107	0.045333	0.008021
2	11.7.2018	35.1599	4.61287	179.211	10.877	144.051	11.8147				0.105667	0.01193	0.0665	0.002121
3	12.7.2018	21.7836	0.93734	144.72	2.4152	122.936	2.59071				0.145667	0.01193	0.119667	0.01193
4	13.7.2018	21.826	0.916448	172.119	6.51623	150.293	6.58036				0.153333	0.010693	0.154667	0.01097
7	16.7.2018	22.9381	1.45018	143.503	4.58929	120.565	4.81297				0.415333	0.058705	0.639333	0.106006
8	17.7.2018	21.662	0.99832	130.957	4.95477	109.295	5.05434				0.648667	0.090279	1.01033	0.147555
9	18.7.2018	21.4905	1.31704	132.454	3.80621	110.964	4.02763				0.994333	0.211909	1.49567	0.143514
14	23.7.2018	18.6104	0.329213	121.825	6.49684	103.215	6.50518				6.44	0.091652	6.73	0.355704
22	31.7.2018	21.9851	1.81652	160.266	4.74213	138.281	5.07814				16.4933	5.98469	10.3733	1.06214
		Here are average fluorescence values of three biological replicates, calculated and listed in seperate sheets									This is the growth curve of three biological replicates

## Sheet: 1 dai
	pMJc01-EV			pMJc01_L21_RBS*_GFPmut3b				Since the A730 has not yet reached 0.1, F was measured at lower values (0.037) and F was multiplied by factor of dilution (2.7).								pMJc01-EV			pMJc01_L21_RBS*_GFPmut3b
lambda [nm]	EV1	EV2	EV3	GFP1	GFP2	GFP2									lambda [nm]	EV1	EV2	EV3	GFP1	GFP2	GFP3
505	17.7518	17.631	20.336	40.4036	36.4524	43.4642									505	47.9299	47.6037	54.9072	109.09	98.4215	117.353
505.5	17.4709	16.9212	19.3339	41.2582	37.4325	45.4486									505.5	47.1715	45.6872	52.2015	111.397	101.068	122.711
506	17.1481	16.3335	18.5176	42.2329	38.439	47.2957		A730 measurements							506	46.2999	44.1005	49.9975	114.029	103.785	127.698
506.5	16.8641	15.9582	17.9571	43.3279	39.5133	49.1308		EV1	EV2	EV3	GFP1	GFP2	GFP3		506.5	45.533	43.0872	48.4842	116.985	106.686	132.653
507	16.6417	15.7011	17.6136	44.666	40.6786	50.9872		0.069	0.08	0.052	0.046	0.053	0.037		507	44.9327	42.393	47.5568	120.598	109.832	137.665
507.5	16.3956	15.3897	17.3449	46.1815	41.9294	52.6905									507.5	44.2681	41.5523	46.8312	124.69	113.209	142.264
508	16.2042	15.0199	17.0524	47.7692	43.2048	54.4566			average	SD					508	43.7514	40.5538	46.0416	128.977	116.653	147.033
508.5	15.9683	14.5977	16.7216	49.3482	44.4763	56.2124		EV	0.067	0.0141067					508.5	43.1143	39.4137	45.1483	133.24	120.086	151.773
509	15.6509	14.1995	16.3858	50.9873	45.722	58.0268		GFP	0.0453333	0.00802081					509	42.2575	38.3385	44.2417	137.666	123.449	156.672
509.5	15.3124	13.9406	16.0964	52.5143	46.9448	59.8882									509.5	41.3435	37.6397	43.4602	141.789	126.751	161.698
510	15.0355	13.8079	15.9393	54.0719	48.127	61.8345									510	40.596	37.2814	43.0361	145.994	129.943	166.953
510.5	14.8135	13.7199	15.8149	55.6611	49.4061	63.614		Fluorescence at 517.5 nm							510.5	39.9964	37.0436	42.7003	150.285	133.396	171.758
511	14.6733	13.6988	15.693	57.1035	50.6655	65.3873		EV1	EV2	EV3	GFP1	GFP2	GFP3		511	39.6178	36.9867	42.3712	154.179	136.797	176.546
511.5	14.5456	13.6331	15.6113	58.3231	51.8965	67.0268		34.2867	32.3697	37.1117	180.432	160.073	207.284		511.5	39.2732	36.8094	42.1506	157.472	140.121	180.972
512	14.3729	13.496	15.4842	59.4694	53.0842	68.5809									512	38.8067	36.4392	41.8074	160.568	143.327	185.168
512.5	14.1944	13.3825	15.2976	60.4594	54.1826	70.0673			average	SD					512.5	38.3249	36.1328	41.3035	163.24	146.293	189.182
513	13.9998	13.2231	15.106	61.3744	55.1794	71.4557		EV	34.5894	2.38542					513	37.7996	35.7025	40.7861	165.711	148.984	192.93
513.5	13.7872	13.0199	14.8676	62.2939	56.1473	72.4927		GFP	182.596	23.6795					513.5	37.2255	35.1538	40.1426	168.194	151.598	195.73
514	13.6123	12.8752	14.5701	63.2047	56.9594	73.3997									514	36.7532	34.763	39.3394	170.653	153.79	198.179
514.5	13.4929	12.8	14.3081	64.0375	57.5688	74.2									514.5	36.4307	34.5599	38.6319	172.901	155.436	200.34
515	13.3902	12.6945	14.1161	64.788	58.0314	74.8497									515	36.1535	34.2752	38.1134	174.928	156.685	202.094
515.5	13.2963	12.6373	14.0021	65.3958	58.4165	75.5325									515.5	35.9001	34.1206	37.8056	176.569	157.725	203.938
516	13.2008	12.5528	13.9592	65.8935	58.734	76.1931									516	35.6422	33.8926	37.6899	177.912	158.582	205.721
516.5	13.0429	12.3931	13.9159	66.2807	59.0379	76.6064									516.5	35.2158	33.4614	37.573	178.958	159.402	206.837
517	12.8645	12.1625	13.8471	66.6004	59.2671	76.7929									517	34.7342	32.8387	37.3871	179.821	160.021	207.341
517.5	12.6988	11.9888	13.7451	66.8267	59.2864	76.7717									517.5	34.2867	32.3697	37.1117	180.432	160.073	207.284
518	12.6004	11.8374	13.5837	66.8204	59.0556	76.4853									518	34.0211	31.9609	36.676	180.415	159.45	206.51
518.5	12.4918	11.7553	13.4143	66.5333	58.6063	75.978									518.5	33.7278	31.7393	36.2185	179.64	158.237	205.141
519	12.4521	11.7452	13.2724	65.9889	58.1227	75.3032									519	33.6208	31.712	35.8356	178.17	156.931	203.319
519.5	12.4163	11.7381	13.1174	65.1934	57.6179	74.4934									519.5	33.5241	31.6929	35.4169	176.022	155.568	201.132
520	12.3066	11.6324	12.997	64.274	57.1198	73.7756									520	33.2279	31.4074	35.0919	173.54	154.223	199.194
520.5	12.1772	11.4921	12.9135	63.3758	56.5478	73.0052									520.5	32.8783	31.0287	34.8665	171.115	152.679	197.114
521	12.1097	11.3234	12.8093	62.4964	55.8611	72.0837									521	32.6963	30.5732	34.5851	168.74	150.825	194.626
521.5	12.0141	11.1609	12.7249	61.6482	54.9725	70.9871									521.5	32.4381	30.1344	34.3572	166.45	148.426	191.665
522	11.975	11.0843	12.6421	60.7454	54.0166	69.6372									522	32.3325	29.9276	34.1338	164.013	145.845	188.021
522.5	12.0102	11.0961	12.5968	59.8025	53.0021	68.136									522.5	32.4274	29.9595	34.0114	161.467	143.106	183.967
523	12.014	11.1719	12.5674	58.6967	51.9353	66.81									523	32.4379	30.1641	33.932	158.481	140.225	180.387
523.5	12.0436	11.2569	12.5543	57.5173	50.8444	65.5465									523.5	32.5177	30.3936	33.8966	155.297	137.28	176.976
524	12.1178	11.3247	12.5302	56.1554	49.737	64.2715									524	32.7182	30.5766	33.8315	151.62	134.29	173.533
524.5	12.1594	11.3503	12.4958	54.6956	48.5836	62.9271									524.5	32.8304	30.6457	33.7387	147.678	131.176	169.903
525	12.2112	11.357	12.4208	53.2395	47.5154	61.4286									525	32.9702	30.664	33.5362	143.747	128.292	165.857
525.5	12.2568	11.3461	12.4238	51.9073	46.5655	59.8705									525.5	33.0932	30.6344	33.5442	140.15	125.727	161.65
526	12.2377	11.3915	12.4818	50.6438	45.663	58.4976									526	33.0418	30.7571	33.7008	136.738	123.29	157.944
526.5	12.2071	11.465	12.5997	49.6338	44.7742	57.2879									526.5	32.9593	30.9556	34.0193	134.011	120.89	154.677
527	12.1997	11.5793	12.7418	48.7246	43.8125	56.1714									527	32.9392	31.2642	34.403	131.556	118.294	151.663
527.5	12.2234	11.7228	12.903	47.7808	42.7893	55.1008									527.5	33.0032	31.6515	34.8382	129.008	115.531	148.772
528	12.3337	11.8455	12.9891	46.8043	41.8097	53.9401									528	33.301	31.983	35.0707	126.372	112.886	145.638
528.5	12.4727	11.8597	12.9757	45.8413	40.994	52.7614									528.5	33.6763	32.0213	35.0345	123.772	110.684	142.456
529	12.6096	11.7632	12.8103	44.8898	40.3991	51.6744									529	34.0458	31.7607	34.5878	121.202	109.078	139.521
529.5	12.7353	11.5347	12.479	44.1417	40.0465	50.6797									529.5	34.3854	31.1437	33.6934	119.182	108.126	136.835
530	12.8274	11.2046	12.0374	43.5018	39.8234	49.7946									530	34.634	30.2524	32.501	117.455	107.523	134.445
	FLUORESCENCE MEASUREMENTS AT A730=0.037															FLUORESCENCE NORMALIZED TO A730=0.1

## Sheet: 2 dai
	pMJc01-EV			pMJc01_L21_RBS*_GFPmut3b				Since the A730 has not yet reached 0.1, F was measured at lower values (0.037) and F was multiplied by factor of dilution (2.7).								pMJc01-EV			pMJc01_L21_RBS*_GFPmut3b
lambda [nm]	EV1	EV2	EV3	GFP1	GFP2	GFP2									lambda [nm]	EV1	EV2	EV3	GFP1	GFP2	GFP2
505	20.171	18.5088	19.8432	40.8266	39.7022	57.1723									505	54.4617	49.9738	53.5766	110.232	107.196	154.365
505.5	19.8364	16.9379	18.9114	40.7287	41.2029	60.209									505.5	53.5583	45.7324	51.0607	109.967	111.248	162.564
506	19.4461	15.7261	18.1754	40.9865	42.6033	63.0877		A730 measurements							506	52.5044	42.4604	49.0736	110.664	115.029	170.337
506.5	19.0603	14.9706	17.6703	41.6252	44.0793	65.6727		EV1	EV2	EV3	GFP1	GFP2	GFP3		506.5	51.4628	40.4207	47.7097	112.388	119.014	177.316
507	18.7192	14.5788	17.3528	42.6682	45.636	68.0565		0.096	0.119	0.102	0.068	0.065	0.04		507	50.5418	39.3629	46.8526	115.204	123.217	183.752
507.5	18.3886	14.3799	17.1038	44.0177	47.1663	70.3683									507.5	49.6493	38.8258	46.1803	118.848	127.349	189.995
508	18.1034	14.1678	16.8598	45.5187	48.7789	72.8065			average	SD					508	48.8791	38.2532	45.5214	122.9	131.703	196.577
508.5	17.8977	13.8971	16.625	47.0002	50.4472	75.4402		EV	0.105667	0.0119304					508.5	48.3239	37.5223	44.8876	126.901	136.207	203.688
509	17.6499	13.6693	16.4164	48.5543	52.1155	78.1356		GFP	0.0576667	0.0153731					509	47.6548	36.9072	44.3243	131.097	140.712	210.966
509.5	17.3901	13.4914	16.1807	50.134	53.9092	80.9239									509.5	46.9532	36.4267	43.6879	135.362	145.555	218.494
510	17.1839	13.315	15.9293	51.698	55.8035	83.6499		Fluorescence at 517.5 nm							510	46.3966	35.9505	43.0092	139.585	150.669	225.855
510.5	16.9639	13.1188	15.6363	53.1513	57.5779	86.1554		EV1	EV2	EV3	GFP1	GFP2	GFP3		510.5	45.8024	35.4207	42.218	143.509	155.46	232.62
511	16.7381	12.9447	15.3502	54.5343	59.2241	88.3982		39.2938	30.184	36.0019	171.518	186.904	285.764		511	45.1927	34.9507	41.4456	147.243	159.905	238.675
511.5	16.569	12.793	15.1561	55.7784	60.6125	90.6157									511.5	44.7364	34.541	40.9213	150.602	163.654	244.662
512	16.3517	12.653	15.0859	56.8594	61.7789	92.8105			average	SD					512	44.1495	34.163	40.732	153.52	166.803	250.588
512.5	16.1095	12.5724	15.0565	57.8139	62.9533	94.9974		EV	35.1599	4.61287					512.5	43.4955	33.9455	40.6525	156.098	169.974	256.493
513	15.9217	12.4951	15.0058	58.7913	64.1897	97.2137		GFP	179.211	10.8797					513	42.9887	33.7366	40.5156	158.737	173.312	262.477
513.5	15.7407	12.4463	14.8504	59.7455	65.4028	99.1171				GFP3 measurement was discarded as an outlier					513.5	42.4998	33.605	40.0962	161.313	176.587	267.616
514	15.5683	12.4146	14.5927	60.6566	66.6082	100.375									514	42.0345	33.5195	39.4002	163.773	179.842	271.013
514.5	15.4321	12.3795	14.3047	61.5602	67.6196	101.464									514.5	41.6667	33.4248	38.6227	166.213	182.573	273.954
515	15.2596	12.2951	14.0422	62.3607	68.3888	102.459									515	41.2008	33.1968	37.9138	168.374	184.65	276.64
515.5	15.03	12.1662	13.843	62.958	68.9392	103.403									515.5	40.5811	32.8487	37.3762	169.987	186.136	279.189
516	14.8363	11.9427	13.7339	63.4155	69.2968	104.457									516	40.0579	32.2454	37.0814	171.222	187.101	282.034
516.5	14.6732	11.6672	13.6236	63.7173	69.4196	105.464									516.5	39.6176	31.5016	36.7836	172.037	187.433	284.753
517	14.5687	11.4057	13.4798	63.7316	69.3876	105.84									517	39.3354	30.7954	36.3956	172.075	187.346	285.767
517.5	14.5533	11.1793	13.334	63.525	69.2236	105.839									517.5	39.2938	30.184	36.0019	171.518	186.904	285.764
518	14.5614	11.0569	13.1959	63.1737	69.0614	105.498									518	39.3159	29.8536	35.6288	170.569	186.466	284.846
518.5	14.5185	11.0299	13.0708	62.6071	68.8411	104.649									518.5	39.2	29.7806	35.2912	169.039	185.871	282.552
519	14.4628	11.0453	13.0266	61.9822	68.4954	103.623									519	39.0495	29.8224	35.1718	167.352	184.938	279.781
519.5	14.3598	11.0779	12.9497	61.2962	68.009	102.622									519.5	38.7714	29.9103	34.9642	165.5	183.624	277.078
520	14.2027	11.1085	12.8365	60.5431	67.4031	101.304									520	38.3472	29.993	34.6585	163.466	181.988	273.522
520.5	14.0328	11.051	12.7428	59.7262	66.624	100.166									520.5	37.8886	29.8377	34.4055	161.261	179.885	270.447
521	13.8843	10.9667	12.6855	58.9632	65.8109	99.2515									521	37.4877	29.6101	34.2508	159.201	177.689	267.979
521.5	13.7333	10.8805	12.6365	58.1358	64.8414	98.0402									521.5	37.0798	29.3772	34.1185	156.967	175.072	264.709
522	13.6451	10.8044	12.6397	57.3046	63.6599	96.5311									522	36.8417	29.1718	34.1272	154.722	171.882	260.634
522.5	13.614	10.738	12.595	56.355	62.2579	94.6496									522.5	36.7578	28.9926	34.0065	152.158	168.096	255.554
523	13.5936	10.6981	12.4686	55.2574	60.8191	92.225									523	36.7028	28.8848	33.6653	149.195	164.212	249.007
523.5	13.565	10.6236	12.335	54.0361	59.3927	89.7045									523.5	36.6255	28.6837	33.3046	145.897	160.36	242.202
524	13.5389	10.5642	12.2284	52.8056	58.1363	87.4352									524	36.5552	28.5235	33.0166	142.575	156.968	236.075
524.5	13.5315	10.5338	12.2225	51.617	56.9309	85.3693									524.5	36.5352	28.4413	33.0009	139.366	153.714	230.497
525	13.5758	10.5644	12.3364	50.5439	55.7546	83.5146									525	36.6547	28.5238	33.3084	136.469	150.537	225.489
525.5	13.6994	10.6757	12.5263	49.5598	54.4767	81.8784									525.5	36.9884	28.8244	33.8209	133.811	147.087	221.072
526	13.8505	10.8068	12.6888	48.5885	53.1785	80.1214									526	37.3963	29.1784	34.2597	131.189	143.582	216.328
526.5	13.9855	10.8792	12.8344	47.5934	51.8599	78.2195									526.5	37.7607	29.3738	34.653	128.502	140.022	211.193
527	14.0955	10.9661	12.9132	46.5668	50.6661	76.18									527	38.0578	29.6084	34.8657	125.73	136.799	205.686
527.5	14.1697	11.016	12.9616	45.5242	49.4383	74.1872									527.5	38.2583	29.7431	34.9964	122.915	133.483	200.305
528	14.2031	11.0479	12.9944	44.4714	48.2673	72.3602									528	38.3483	29.8293	35.0849	120.073	130.322	195.372
528.5	14.2083	11.167	13.1013	43.512	47.2557	70.9073									528.5	38.3623	30.1509	35.3735	117.482	127.591	191.45
529	14.1638	11.2579	13.2388	42.6438	46.5454	69.8915									529	38.2423	30.3964	35.7448	115.138	125.673	188.707
529.5	14.0548	11.2156	13.4116	41.8705	46.1766	69.2981									529.5	37.9478	30.282	36.2112	113.05	124.677	187.105
530	13.905	11.1972	13.6236	41.19	46.108	68.9355									530	37.5435	30.2324	36.7837	111.213	124.492	186.126
	FLUORESCENCE MEASUREMENTS AT A730=0.037															FLUORESCENCE NORMALIZED TO A730=0.1

## Sheet: 3 dai
	pMJc01-EV			pMJc01_L21_RBS*_GFPmut3b
lambda [nm]	EV1	EV2	EV3	GFP1	GFP2	GFP2
505	29.2368	32.3148	29.4568	79.0094	76.266	74.7364
505.5	28.1485	30.9042	28.4997	81.5559	79.0831	78.1956
506	27.1687	29.693	27.6911	84.3842	82.0642	81.7348		A730 measurements
506.5	26.4574	28.7511	27.0468	87.4649	85.4643	85.3489		EV1	EV2	EV3	GFP1	GFP2	GFP3
507	25.9802	28.1308	26.5428	90.8603	89.1491	88.9605		0.136	0.142	0.159	0.106	0.125	0.128
507.5	25.5983	27.7801	26.1779	94.6555	92.8604	92.6655
508	25.3006	27.5325	25.8045	98.5008	96.5792	96.5373			average	SD
508.5	24.9917	27.2544	25.3569	102.314	100.354	100.426		EV	0.145667	0.0119304
509	24.7051	26.9568	24.8845	106.199	104.016	104.391		GFP	0.119667	0.0119304
509.5	24.4027	26.6283	24.4383	110.106	107.843	108.354
510	24.1171	26.3354	24.0359	114	111.792	112.065		Fluorescence at 517.5 nm
510.5	23.7941	26.065	23.7284	117.988	115.631	115.713		EV1	EV2	EV3	GFP1	GFP2	GFP3
511	23.52	25.8158	23.4625	121.796	119.288	119.397		21.2898	23.01	21.4032	147.159	142.468	144.533
511.5	23.2945	25.5101	23.1733	125.464	122.799	122.845
512	23.1867	25.1917	22.924	128.889	125.885	126.179			average	SD
512.5	23.0758	24.9083	22.7233	132.162	128.673	129.317		EV	21.901	0.962092
513	22.982	24.6643	22.5273	135.254	131.372	132.15		GFP	144.72	2.351
513.5	22.832	24.4196	22.393	138.195	133.844	134.771
514	22.5911	24.1786	22.2555	140.643	136.11	137.231
514.5	22.2285	23.871	22.0515	142.676	138.35	139.27
515	21.8829	23.5636	21.8995	144.215	140.187	140.855
515.5	21.5515	23.3284	21.7561	145.333	141.518	142.01
516	21.3698	23.1727	21.6239	146.208	142.316	142.879
516.5	21.3084	23.077	21.5362	146.873	142.574	143.775
517	21.2898	23.01	21.4032	147.159	142.468	144.533
517.5	21.2819	22.865	21.2039	147.112	142.295	145.011
518	21.2187	22.6286	21.0243	146.661	142.073	145.051
518.5	21.0537	22.3532	20.8624	145.794	141.787	144.583
519	20.876	22.0778	20.7589	144.765	141.281	143.503
519.5	20.7487	21.8965	20.7102	143.505	140.324	142.061
520	20.6058	21.7915	20.6409	142.093	138.823	140.315
520.5	20.4569	21.706	20.5424	140.461	136.788	138.311
521	20.2902	21.6384	20.3594	138.462	134.332	135.981
521.5	20.0622	21.5323	20.0921	135.991	131.681	133.526
522	19.8341	21.3418	19.8813	133.25	129.107	131.001
522.5	19.7055	21.2036	19.8095	130.336	126.661	128.463
523	19.5897	21.1203	19.836	127.459	124.326	126.068
523.5	19.5545	21.1028	19.9314	124.758	121.944	123.594
524	19.5896	21.1698	20.0972	122.137	119.364	121.036
524.5	19.6799	21.2415	20.2149	119.56	116.459	118.307
525	19.7623	21.2271	20.2795	116.868	113.461	115.392
525.5	19.8997	21.25	20.3453	114.034	110.607	112.342
526	20.0518	21.2532	20.4385	111.127	107.94	109.54
526.5	20.2245	21.2654	20.4669	108.162	105.586	106.864
	FLUORESCENCE MEASUREMENTS AT A730=0.1

## Sheet: 4 dai
	pMJc01-EV			pMJc01_L21_RBS*_GFPmut3b
lambda [nm]	EV1	EV2	EV3	GFP1	GFP2	GFP2
505	32.395	34.727	32.056	83.1948	89.0108	86.7044
505.5	29.8742	32.7623	30.7266	88.5632	93.369	92.5361
506	28.0211	31.1613	29.5848	93.6068	97.7719	97.9824		A730 measurements
506.5	26.8611	29.958	28.6609	98.2326	102.135	103.115		EV1	EV2	EV3	GFP1	GFP2	GFP3
507	26.3205	29.1932	27.9226	102.51	106.535	107.917		0.141	0.159	0.16	0.142	0.161	0.161
507.5	26.1993	28.7468	27.3593	106.5	111.196	112.362
508	26.0558	28.3389	26.9035	110.48	115.97	116.877			average	SD
508.5	25.7528	27.9174	26.5123	114.516	120.833	121.611		EV	0.153333	0.0106927
509	25.4607	27.547	26.1709	118.778	125.619	126.458		GFP	0.154667	0.0109697
509.5	25.1012	27.1386	25.8458	123.238	130.25	131.382
510	24.6581	26.7639	25.4922	127.897	134.598	136.279		Fluorescence at 517.5 nm
510.5	24.2338	26.3913	25.1544	132.534	138.774	140.888		EV1	EV2	EV3	GFP1	GFP2	GFP3
511	23.868	26.0109	24.8515	136.933	142.758	145.163		20.8109	22.5925	22.0745	164.792	174.301	177.265
511.5	23.5949	25.6488	24.6472	140.909	146.835	149.218
512	23.4119	25.2695	24.4676	144.624	150.985	153.164			average	SD
512.5	23.2547	24.8364	24.2533	148.071	155.102	156.881		EV	21.826	0.916448
513	23.0206	24.4646	23.9046	151.376	159.033	160.399		GFP	172.119	6.51623
513.5	22.7725	24.1693	23.4784	154.461	162.524	163.751
514	22.506	23.9447	23.0245	157.122	165.403	166.786
514.5	22.3502	23.8013	22.7252	159.337	167.872	169.398
515	22.2636	23.6559	22.5485	161.159	170.015	171.627
515.5	22.1502	23.4628	22.489	162.65	171.749	173.486
516	21.9307	23.2741	22.4543	163.801	173.117	174.896
516.5	21.6354	23.0515	22.4048	164.624	174.029	176.045
517	21.2031	22.8132	22.2371	164.93	174.354	176.852
517.5	20.8109	22.5925	22.0745	164.792	174.301	177.265
518	20.5038	22.3712	21.8424	164.293	173.878	177.204
518.5	20.2919	22.1539	21.598	163.587	173.114	176.759
519	20.1452	21.9674	21.3721	162.579	172.02	175.564
519.5	20.0489	21.749	21.1463	161.25	170.493	173.775
520	19.916	21.5074	20.8751	159.573	168.411	171.498
520.5	19.7724	21.2871	20.6887	157.561	166.083	168.986
521	19.6513	21.1446	20.5648	155.142	163.484	166.12
521.5	19.5761	21.0902	20.5154	152.57	160.704	163.302
522	19.5448	21.1245	20.5533	149.798	157.884	160.33
522.5	19.4833	21.151	20.6394	146.84	154.874	157.213
523	19.4297	21.1159	20.6768	143.737	151.631	153.782
523.5	19.3694	21.0228	20.6278	140.613	148.23	150.284
524	19.3048	20.92	20.5571	137.31	144.512	146.464
524.5	19.2943	20.9197	20.4865	133.895	140.652	142.784
525	19.3552	21.0423	20.4736	130.401	136.991	139.134
525.5	19.4154	21.2301	20.5318	126.966	133.512	135.72
526	19.5068	21.4203	20.6899	123.571	130.324	132.405
526.5	19.5748	21.5715	20.8363	120.502	127.403	129.347
527	19.6168	21.6766	20.9681	117.621	124.496	126.21
527.5	19.6877	21.815	21.1203	114.79	121.409	123.117
528	19.814	21.9755	21.2689	111.923	118.236	119.95
528.5	19.8944	22.0796	21.2646	109.341	115.013	117.127
529	19.907	22.0698	21.1061	107.111	111.975	114.701
529.5	19.8408	21.935	20.7639	105.382	109.223	112.829
530	19.709	21.672	20.2478	104.064	106.701	111.346
	FLUORESCENCE MEASUREMENTS AT A730=0.1

## Sheet: 7 dai
	No raw data was extracted - only fluorescence values at 517.5 nm were noted.
								A730 measurements
								EV1	EV2	EV3	GFP1	GFP2	GFP3
								0.378	0.483	0.385	0.518	0.714	0.686
									average	SD
								EV	0.415333	0.0587055
								GFP	0.639333	0.106006
								Fluorescence at 517.5 nm
								EV1	EV2	EV3	GFP1	GFP2	GFP3
								22.2711	21.9415	24.6018	147.379	138.436	144.695
									average	SD
								EV	22.9381	1.45018
								GFP	143.503	4.58929

## Sheet: 8 dai
	No raw data was extracted - only fluorescence values at 517.5 nm were noted.
								A730 measurements
								EV1	EV2	EV3	GFP1	GFP2	GFP3
								0.623	0.749	0.574	0.84	1.099	1.092
									average	SD
								EV	0.648667	0.0902792
								GFP	1.01033	0.147555
								Fluorescence at 517.5 nm
								EV1	EV2	EV3	GFP1	GFP2	GFP3
								21.1802	20.996	22.8099	136.314	130.016	126.539
									average	SD
								EV	21.662	0.99832
								GFP	130.957	4.95477

## Sheet: 9 dai
	No raw data was extracted - only fluorescence values at 517.5 nm were noted.
								A730 measurements
								EV1	EV2	EV3	GFP1	GFP2	GFP3
								0.875	1.239	0.869	1.33	1.582	1.575
									average	SD
								EV	0.994333	0.211909
								GFP	1.49567	0.143514
								Fluorescence at 517.5 nm
								EV1	EV2	EV3	GFP1	GFP2	GFP3
								22.2117	19.9704	22.2895	131.015	129.578	136.77
									average	SD
								EV	21.4905	1.31704
								GFP	132.454	3.80621

## Sheet: 14 dai
	No raw data was extracted - only fluorescence values at 517.5 nm were noted.
								A730 measurements
								EV1	EV2	EV3	GFP1	GFP2	GFP3
								6.36	6.54	6.42	6.675	6.405	7.11
									average	SD
								EV	6.44	0.0916515
								GFP	6.73	0.355704
								Fluorescence at 517.5 nm
								EV1	EV2	EV3	GFP1	GFP2	GFP3
								18.5514	18.3659	19.0058	115.988	128.825	120.663
									average	SD
								EV	18.641	0.329213
								GFP	121.825	6.49684

## Sheet: 22 dai
	No raw data was extracted - only fluorescence values at 517.5 nm were noted.
								A730 measurements
								EV1	EV2	EV3	GFP1	GFP2	GFP3
								15.48	11.08	22.92	9.96	9.58	11.58
									average	SD
								EV	16.4933	5.98469
								GFP	10.3733	1.06214
								Fluorescence at 517.5 nm
								EV1	EV2	EV3	GFP1	GFP2	GFP3
								22.5834	19.9449	23.427	155.651	165.126	160.021
									average	SD
								EV	21.9851	1.81652
								GFP	160.266	4.74213
