# Supplementary material for: A chimeric vector for dual use in cyanobacteria and Escherichia coli, tested with cystatin, a nonfluorescent reporter protein
Source: PeerJ. 2021 Nov 3;9:e12199. doi: 10.7717/peerj.12199 (PMC8571960; doi:10.7717/peerj.12199)
Supplement: Supplemental Information 9 — Raw data supporting Figure 3. [file peerj-09-12199-s009.xlsx]

## Sheet: culture
		pPMQAK1		pSB3K3		pMJc01
		J23101_B0032	L21_RBS*	J23101_B0032	L21_RBS*	J23101_B0032	L21_RBS*
	average F/A600	1069.88	3071.71	497.756	3334.89	1944.7	6506.24
	SD	92.7676	172.523	151.198	313.938	121.999	1090.3
		Raw data and calculations are on separate sheets.

## Sheet: lysate
		pPMQAK1		pSB3K3		pMJc01
		J23101_B0032	L21_RBS*	J23101_B0032	L21_RBS*	J23101_B0032	L21_RBS*
	average F/A600	150.455	484.839	199.433	682.571	384.582	916.331
	SD	18.669	46.9512	15.8829	30.2172	16.1095	39.2992
		Raw data and calculations are on separate sheets.

## Sheet: pPMQAK1-culture
	pPMQAK1-EV						pPMQAK1-J23101_B0032						pPMQAK1-L21_RBS*
	A600	0.136	A600	0.124	A600	0.131	A600	0.11	A600	0.106	A600	0.108	A600	0.099	A600	0.099	A600	0.096		M = measurement
	EV1		EV2		EV3		BB1		BB2		BB3		L*1		L*2		L*3			N = normalized ofr Abs600, F/Abs600
lambda [nm]	M	N	M	N	M	N	M	N	M	N	M	N	M	N	M	N	M	N
505	162.413	1194.21	153.908	1241.2	152.564	1164.61	195.623	1778.39	187.634	1770.13	190.354	1762.54	267.12	2698.18	268.892	2716.08	249.713	2601.17
505.5	162.804	1197.09	158.506	1278.27	158.309	1208.47	200.984	1827.13	196.69	1855.56	194.284	1798.92	276.003	2787.91	279.383	2822.05	259.446	2702.57
506	163.836	1204.67	162.427	1309.89	162.794	1242.71	206.312	1875.56	204.237	1926.76	198.472	1837.7	285.933	2888.21	290.196	2931.27	269.302	2805.23
506.5	165.755	1218.79	165.296	1333.03	165.972	1266.96	211.71	1924.63	210.334	1984.29	202.864	1878.37	296.968	2999.68	301.376	3044.21	279.029	2906.56
507	168.225	1236.95	167.794	1353.18	168.212	1284.06	217.065	1973.31	214.945	2027.78	207.845	1924.49	308.761	3118.8	312.872	3160.32	289.149	3011.96
507.5	170.81	1255.96	170.139	1372.09	170.81	1303.89	222.404	2021.86	219.308	2068.95	213.365	1975.6	320.484	3237.21	324.741	3280.21	299.082	3115.44
508	173.109	1272.86	172.349	1389.91	173.535	1324.69	227.839	2071.26	223.855	2111.84	218.736	2025.34	331.772	3351.23	336.677	3400.78	308.893	3217.64
508.5	175.224	1288.41	174.444	1406.81	175.936	1343.02	233.401	2121.82	228.42	2154.91	223.786	2072.09	342.895	3463.58	348.555	3520.76	318.538	3318.11			Fluorescence/Abs600
509	177.42	1304.56	176.236	1421.26	178.122	1359.71	238.981	2172.56	233.241	2200.38	228.201	2112.97	353.922	3574.97	360.505	3641.46	328.061	3417.3			1	2	3	average F/A600	SD	GFP-EV F/A600	GFP-EV SD
509.5	179.741	1321.62	178.28	1437.74	179.903	1373.31	244.266	2220.6	238.524	2250.23	232.211	2150.1	364.977	3686.63	372.05	3758.08	338.192	3522.83		pMQAK1-EV	1525.91	1671.07	1587.08	1594.68	72.8784
510	182.318	1340.57	180.696	1457.23	181.863	1388.27	249.097	2264.52	244.025	2302.12	236.753	2192.15	376.099	3798.98	383.111	3869.81	348.68	3632.08		pPMQAK1-J23101_B0032	2684.28	2709.51	2599.91	2664.57	57.3983	1069.88	92.7676
510.5	184.848	1359.17	183.181	1477.27	184.068	1405.1	253.569	2305.17	249.305	2351.94	241.605	2237.08	386.661	3905.67	393.581	3975.57	359.247	3742.16		pPMQAK1-L21_RBS*	4713.17	4794.05	4491.97	4666.4	156.375	3071.71	172.523
511	186.818	1373.66	185.632	1497.03	186.318	1422.28	258.104	2346.4	254.091	2397.08	246.33	2280.83	396.482	4004.87	403.363	4074.38	368.897	3842.67
511.5	188.39	1385.22	187.511	1512.19	188.664	1440.18	262.746	2388.6	258.035	2434.29	250.717	2321.45	405.598	4096.95	413.037	4172.09	377.091	3928.03
512	190.029	1397.27	188.848	1522.97	190.741	1456.04	267.33	2430.27	261.647	2468.37	254.219	2353.88	414.379	4185.64	422.442	4267.09	384.56	4005.83
512.5	192.08	1412.36	190.268	1534.42	192.486	1469.36	271.491	2468.1	265.12	2501.13	257.608	2385.26	423.389	4276.66	431.5	4358.59	391.553	4078.68
513	194.497	1430.13	191.888	1547.48	194.111	1481.76	274.791	2498.1	268.695	2534.85	260.851	2415.29	431.834	4361.96	440.043	4444.87	398.579	4151.87
513.5	196.69	1446.25	194.057	1564.97	195.416	1491.73	277.838	2525.8	272.372	2569.55	264.028	2444.7	439.207	4436.43	447.493	4520.13	405.329	4222.18
514	198.291	1458.02	196.305	1583.11	196.718	1501.66	280.697	2551.79	275.52	2599.24	267.273	2474.75	445.252	4497.49	454.109	4586.96	411.6	4287.5
514.5	199.359	1465.87	198.094	1597.53	198.421	1514.66	283.355	2575.95	278.526	2627.6	270.177	2501.64	450.009	4545.55	459.729	4643.73	417.187	4345.7
515	200.073	1471.13	199.74	1610.81	200.093	1527.43	285.833	2598.48	281.093	2651.82	273.073	2528.45	454.635	4592.27	464.216	4689.06	421.848	4394.25
515.5	200.967	1477.7	201.141	1622.1	201.791	1540.39	287.695	2615.41	283.316	2672.79	275.439	2550.36	459.02	4636.57	467.539	4722.61	425.386	4431.1
516	202.223	1486.94	202.595	1633.83	203.442	1552.99	289.489	2631.72	285.119	2689.8	277.313	2567.71	462.474	4671.46	470.131	4748.8	427.45	4452.61
516.5	203.76	1498.24	203.909	1644.43	204.782	1563.22	291.163	2646.93	286.18	2699.81	278.665	2580.23	465.068	4697.66	472.366	4771.38	428.678	4465.39
517	205.215	1508.93	205.082	1653.89	206.048	1572.88	293.03	2663.91	286.819	2705.84	279.421	2587.23	466.464	4711.76	474.051	4788.39	429.599	4474.99
517.5	206.524	1518.56	206.231	1663.15	206.99	1580.08	294.551	2677.74	286.965	2707.21	280.261	2595.01	466.775	4714.9	474.928	4797.26	430.535	4484.74
518	207.524	1525.91	207.212	1671.07	207.907	1587.08	295.271	2684.28	287.208	2709.51	280.79	2599.91	466.603	4713.17	474.611	4794.05	431.229	4491.97
518.5	208.491	1533.02	208.347	1680.22	208.794	1593.85	295.142	2683.11	287.715	2714.3	281.109	2602.86	465.223	4699.22	473.143	4779.22	431.256	4492.25
519	209.833	1542.89	209.26	1687.58	209.612	1600.09	294.127	2673.88	288.246	2719.3	280.919	2601.1	462.847	4675.22	470.65	4754.04	430.325	4482.55
519.5	211.247	1553.29	210.129	1694.59	210.429	1606.33	293.284	2666.22	288.709	2723.67	280.462	2596.87	459.649	4642.92	467.437	4721.59	428.223	4460.66
520	212.764	1564.44	210.723	1699.38	211.144	1611.79	292.445	2658.59	288.775	2724.29	280.29	2595.28	455.797	4604.01	463.468	4681.5	425.272	4429.92
520.5	213.846	1572.4	211.234	1703.5	211.978	1618.15	291.955	2654.13	288.48	2721.51	280.154	2594.02	452.089	4566.56	458.858	4634.93	421.65	4392.19
521	214.285	1575.62	212.046	1710.05	212.661	1623.37	291.76	2652.36	287.701	2714.16	279.857	2591.27	448.298	4528.27	454.164	4587.52	417.987	4354.04
521.5	214.37	1576.25	212.854	1716.56	213.394	1628.96	290.882	2644.38	286.415	2702.03	279.003	2583.36	443.926	4484.1	449.459	4539.99	414.142	4313.98
522	214.198	1574.98	213.751	1723.8	214.058	1634.03	289.567	2632.43	284.57	2684.62	277.721	2571.49	438.751	4431.83	444.773	4492.65	409.851	4269.28
522.5	214.346	1576.07	214.302	1728.24	214.735	1639.2	287.556	2614.14	282.741	2667.37	276.485	2560.05	432.938	4373.11	439.765	4442.07	404.922	4217.94
523	214.757	1579.1	214.343	1728.57	215.469	1644.8	285.408	2594.62	281.166	2652.51	274.919	2545.55	426.848	4311.6	434.306	4386.93	399.299	4159.36
523.5	215.146	1581.95	214.23	1727.66	215.961	1648.55	283.424	2576.59	279.691	2638.59	272.981	2527.6	421.345	4256.01	428.203	4325.28	393.613	4100.14
524	215.258	1582.78	214.354	1728.66	216.157	1650.06	281.359	2557.81	278.37	2626.13	270.56	2505.19	416.076	4202.79	421.526	4257.84	388.245	4044.22
524.5	215.262	1582.81	214.533	1730.1	215.829	1647.55	278.988	2536.25	276.656	2609.96	268.19	2483.24	410.127	4142.7	414.626	4188.14	383.299	3992.7
525	215.666	1585.78	214.525	1730.04	215.222	1642.92	276.517	2513.79	274.951	2593.88	266.534	2467.91	403.276	4073.49	407.887	4120.07	378.15	3939.06
525.5	216.386	1591.07	214.527	1730.06	214.965	1640.96	274.239	2493.08	273.674	2581.83	265.222	2455.76	396.311	4003.14	401.97	4060.31	372.676	3882.04
526	217.285	1597.68	214.645	1731.01	215.356	1643.94	272.363	2476.03	272.457	2570.35	263.921	2443.72	390.197	3941.38	396.529	4005.34	367.261	3825.64
526.5	217.881	1602.07	215.229	1735.72	216.249	1650.75	270.9	2462.73	271.101	2557.55	262.38	2429.44	385.255	3891.47	391.355	3953.08	362.404	3775.04

## Sheet: pSB3K3-culture
	pSB3K3-EV						pSB3K3-J23101_B0032						pSB3K3-L21_RBS*
	A600	0.096	A600	0.102	A600	0.101	A600	0.146	A600	0.125	A600	0.146	A600	0.129	A600	0.118	A600	0.133		M = measurement
	EV1		EV2		EV3		BB1		BB2		BB3		L*1		L*2		L*3			N = normalized ofr Abs600, F/Abs600
lambda [nm]	M	N	M	N	M	N	M	N	M	N	M	N	M	N	M	N	M	N
505	150.582	1568.56	154.247	1512.23	155.269	1537.32	231.016	1582.3	220.376	1763.01	229.649	1572.93	340.652	2640.71	341.8	2896.61	348.878	2623.14
505.5	153.381	1597.72	155.488	1524.39	157.951	1563.87	235.076	1610.11	223.394	1787.15	234.714	1607.63	357.519	2771.46	361.778	3065.91	371.177	2790.81
506	155.782	1622.73	157.084	1540.03	160.371	1587.83	240.46	1646.99	227.778	1822.22	240.223	1645.36	374.19	2900.7	380.591	3225.35	391.769	2945.63
506.5	158.097	1646.84	159.091	1559.71	162.557	1609.47	247.22	1693.29	233.34	1866.72	246.81	1690.48	391.236	3032.84	398.922	3380.69	410.689	3087.88
507	160.324	1670.04	161.507	1583.4	164.777	1631.46	254.929	1746.09	240.178	1921.43	254.122	1740.56	408.806	3169.04	416.683	3531.22	429.032	3225.81
507.5	162.785	1695.67	163.871	1606.58	166.896	1652.43	262.561	1798.37	247.34	1978.72	261.952	1794.19	426.83	3308.76	434.945	3685.97	447.912	3367.76
508	165.511	1724.07	166.339	1630.77	169.128	1674.53	269.892	1848.57	253.999	2032	269.489	1845.81	445.309	3452.01	454.249	3849.57	467.511	3515.12
508.5	167.998	1749.98	168.874	1655.63	171.315	1696.19	277.283	1899.2	261.41	2091.28	276.77	1895.69	463.586	3593.69	473.402	4011.88	487.357	3664.34			Fluorescence/Abs600
509	170.314	1774.1	171.317	1679.58	173.48	1717.62	284.691	1949.94	268.781	2150.25	283.819	1943.97	481.79	3734.81	492.138	4170.66	507.079	3812.63			1	2	3	average F/A600	SD	GFP-EV F/A600	GFP-EV SD
509.5	172.245	1794.22	173.808	1704	175.693	1739.54	292.034	2000.24	275.919	2207.35	290.832	1992	500.22	3877.67	510.311	4324.67	526.675	3959.96		pMQAK1-EV	2082.19	1967.53	2018.04	2022.58	57.4662
510	174.201	1814.6	175.995	1725.45	177.828	1760.68	299.014	2048.04	282.698	2261.58	297.866	2040.18	518.728	4021.15	527.766	4472.59	545.317	4100.13		pPMQAK1-J23101_B0032	2446.96	2681.61	2432.45	2520.34	139.852	497.756	151.198
510.5	176.371	1837.2	177.973	1744.84	180.062	1782.79	305.487	2092.37	288.178	2305.42	304.322	2084.4	536.716	4160.59	544.929	4618.04	562.623	4230.24		pPMQAK1-L21_RBS*	5137.12	5710.22	5225.09	5357.48	308.634	3334.89	313.938
511	178.487	1859.24	179.883	1763.55	182.237	1804.33	311.326	2132.37	293.139	2345.11	310.19	2124.59	553.41	4290	561.786	4760.9	579.072	4353.93
511.5	180.525	1880.47	181.682	1781.2	184.289	1824.64	316.854	2170.24	297.841	2382.73	315.82	2163.15	568.46	4406.66	577.994	4898.25	594.737	4471.71
512	182.13	1897.19	183.786	1801.82	186.042	1842	322.41	2208.29	302.638	2421.11	321.08	2199.18	582.838	4518.12	593.422	5029	610.275	4588.54
512.5	183.572	1912.21	185.985	1823.38	187.352	1854.97	328.154	2247.63	307.631	2461.04	326.166	2234.02	596.616	4624.93	607.863	5151.38	625.174	4700.56
513	185.158	1928.73	187.928	1842.43	188.585	1867.18	333.931	2287.2	312.407	2499.25	331.397	2269.84	609.742	4726.68	621.008	5262.78	639.215	4806.13
513.5	186.788	1945.71	189.536	1858.19	190.091	1882.09	338.899	2321.23	316.894	2535.15	336.367	2303.88	622.185	4823.14	632.685	5361.74	652.544	4906.35
514	188.728	1965.92	190.749	1870.09	191.797	1898.98	343.101	2350.01	321.035	2568.28	341.21	2337.05	632.794	4905.38	643.056	5449.62	664.375	4995.3
514.5	190.551	1984.9	192.137	1883.69	193.621	1917.04	346.573	2373.79	324.724	2597.79	345.115	2363.8	641.995	4976.71	651.938	5524.9	674.275	5069.73
515	192.417	2004.34	193.765	1899.66	195.249	1933.16	349.383	2393.04	327.777	2622.21	347.826	2382.37	649.111	5031.87	659.457	5588.62	681.723	5125.74
515.5	194.411	2025.11	195.362	1915.32	196.842	1948.93	351.848	2409.92	330.33	2642.64	350.137	2398.2	653.798	5068.2	665.538	5640.15	687.194	5166.87
516	195.831	2039.91	196.792	1929.33	198.669	1967.02	353.62	2422.05	332.058	2656.46	351.492	2407.48	656.487	5089.05	669.847	5676.67	691.616	5200.12
516.5	196.856	2050.59	197.868	1939.88	200.232	1982.5	354.673	2429.26	333.168	2665.35	352.979	2417.66	657.918	5100.14	672.881	5702.39	695.176	5226.89
517	197.602	2058.35	198.855	1949.56	201.727	1997.3	355.619	2435.74	333.962	2671.69	354.149	2425.68	659.436	5111.9	674.569	5716.69	697.063	5241.07
517.5	198.372	2066.37	199.812	1958.94	202.962	2009.52	356.518	2441.91	334.602	2676.82	354.47	2427.87	661.422	5127.31	674.702	5717.81	696.951	5240.24
518	199.89	2082.19	200.688	1967.53	203.822	2018.04	357.256	2446.96	335.201	2681.61	355.138	2432.45	662.689	5137.12	673.806	5710.22	694.937	5225.09
518.5	201.481	2098.76	201.421	1974.71	204.866	2028.37	357.068	2445.67	335.171	2681.37	355.376	2434.08	661.911	5131.1	671.912	5694.17	691.542	5199.57
519	203.017	2114.76	202.369	1984.01	205.677	2036.41	355.592	2435.56	334.452	2675.62	355.469	2434.72	658.851	5107.37	669.44	5673.22	687.65	5170.3
519.5	204.081	2125.84	203.593	1996.01	206.408	2043.64	353.437	2420.8	333.008	2664.07	355.027	2431.69	653.249	5063.95	666.254	5646.22	682.919	5134.73
520	204.701	2132.3	204.722	2007.08	207.179	2051.27	351.396	2406.82	331.24	2649.92	353.357	2420.25	646.418	5010.99	661.33	5604.49	677.163	5091.45
520.5	205.219	2137.7	205.55	2015.2	207.957	2058.98	349.741	2395.48	329.972	2639.77	351.05	2404.45	638.947	4953.08	654.616	5547.59	670.791	5043.54
521	205.477	2140.38	205.879	2018.42	208.615	2065.5	348.249	2385.27	328.875	2631	347.48	2380	630.696	4889.12	645.984	5474.44	663.199	4986.46
521.5	205.671	2142.4	206.115	2020.73	209.183	2071.12	346.279	2371.78	327.487	2619.89	343.488	2352.65	622.147	4822.85	635.923	5389.18	654.526	4921.25
522	205.696	2142.66	206.874	2028.17	209.463	2073.89	343.547	2353.06	325.557	2604.46	340.21	2330.2	613.074	4752.51	625.557	5301.33	644.818	4848.26
522.5	205.727	2142.99	207.646	2035.74	209.38	2073.06	340.371	2331.31	322.878	2583.02	337.641	2312.61	603.331	4676.98	614.992	5211.8	633.903	4766.19
523	205.916	2144.96	208.241	2041.58	209.569	2074.94	337.004	2308.25	319.924	2559.39	335.492	2297.89	592.771	4595.12	604.558	5123.37	622.788	4682.62
523.5	206.093	2146.8	208.651	2045.6	209.674	2075.98	333.515	2284.35	316.927	2535.42	332.87	2279.93	581.786	4509.97	593.978	5033.72	611.255	4595.9
524	206.597	2152.05	208.739	2046.46	209.899	2078.2	330.145	2261.27	313.796	2510.37	329.251	2255.15	570.823	4424.98	582.552	4936.88	599.239	4505.56
524.5	207.174	2158.07	209.075	2049.75	210.249	2081.67	326.72	2237.81	310.43	2483.44	325.236	2227.64	560.528	4345.17	570.626	4835.81	587.369	4416.31
525	207.536	2161.84	209.163	2050.61	210.094	2080.14	323.541	2216.03	307.026	2456.21	321.742	2203.71	550.394	4266.62	558.838	4735.91	575.607	4327.88
525.5	207.405	2160.47	208.709	2046.17	210.034	2079.55	320.54	2195.48	303.882	2431.06	318.931	2184.46	540.787	4192.15	548.235	4646.06	564.724	4246.04
526	206.947	2155.7	208.231	2041.48	209.992	2079.12	317.686	2175.93	301.172	2409.37	316.388	2167.04	531.621	4121.09	538.893	4566.89	554.892	4172.12
526.5	206.8	2154.16	207.704	2036.31	210.006	2079.26	315.06	2157.95	298.793	2390.34	313.828	2149.51	522.117	4047.42	529.939	4491.01	545.459	4101.2

## Sheet: pMJc01-culture
	pMJc01-EV						pMJc01-J23101_B0032						pMJc01-L21_RBS*
	A600	0.133	A600	0.116	A600	0.129	A600	0.125	A600	0.136	A600	0.125	A600	0.099	A600	0.099	A600	0.102		M = measurement
	EV1		EV2		EV3		BB1		BB2		BB3		L*1		L*2		L*3			N = normalized ofr Abs600, F/Abs600
lambda [nm]	M	N	M	N	M	N	M	N	M	N	M	N	M	N	M	N	M	N
505	167.883	1262.28	156.157	1346.18	148.655	1152.36	255.812	2046.5	280.637	2063.5	257.444	2059.55	431.658	4360.18	345.911	3494.05	386.405	3788.29
505.5	169.221	1272.34	158.6	1367.24	156.015	1209.42	265.659	2125.27	289.98	2132.2	270.379	2163.03	457.106	4617.23	370.722	3744.67	408.947	4009.29
506	170.892	1284.91	161.039	1388.27	161.641	1253.03	275.616	2204.93	300.504	2209.59	282.342	2258.74	482.571	4874.45	393.392	3973.65	431.255	4227.99
506.5	173.067	1301.25	163.519	1409.65	165.348	1281.77	285.578	2284.62	312.545	2298.12	293.132	2345.05	508.464	5136	413.878	4180.58	453.925	4450.25
507	175.809	1321.87	165.805	1429.35	167.439	1297.98	296.079	2368.64	324.95	2389.33	303.69	2429.52	534.969	5403.73	432.647	4370.18	477.123	4677.68
507.5	178.781	1344.22	167.996	1448.25	169.29	1312.33	306.614	2452.91	336.983	2477.82	314.718	2517.74	562.477	5681.59	451.612	4561.74	501.009	4911.85
508	181.32	1363.31	170.18	1467.07	171.444	1329.02	316.944	2535.55	348.753	2564.36	326.637	2613.1	590.378	5963.41	472.8	4775.76	524.942	5146.49			Fluorescence/Abs600
508.5	183.703	1381.23	172.424	1486.41	173.723	1346.69	326.945	2615.56	360.392	2649.94	338.317	2706.54	618.134	6243.78	495.605	5006.11	548.469	5377.15			1	2	3	average F/A600	SD	GFP-EV F/A600	GFP-EV SD
509	186.021	1398.65	174.923	1507.95	175.985	1364.23	336.808	2694.46	372.402	2738.25	349.11	2792.88	645.603	6521.25	518.377	5236.13	571.865	5606.52		pMQAK1-EV	1633.71	1759.55	1593.28	1662.18	86.7172
509.5	188.503	1417.32	177.194	1527.54	178.137	1380.91	346.731	2773.85	384.384	2826.35	359.466	2875.73	672.219	6790.09	539.645	5450.96	594.658	5829.98		pPMQAK1-J23101_B0032	3510.07	3636.99	3673.57	3606.88	85.8129	1944.7	121.999
510	191.052	1436.48	179.202	1544.84	180.261	1397.37	356.69	2853.52	395.834	2910.55	369.674	2957.39	698.809	7058.68	558.445	5640.86	616.706	6046.14		pPMQAK1-L21_RBS*	9369.29	7252.29	7883.66	8168.41	1086.85	6506.24	1090.3
510.5	193.531	1455.12	181.03	1560.6	182.44	1414.27	366.311	2930.49	407.216	2994.23	380.536	3044.29	724.789	7321.1	576.281	5821.02	637.708	6252.04
511	195.994	1473.64	182.767	1575.58	184.802	1432.57	375.046	3000.37	417.948	3073.14	391.255	3130.04	749.671	7572.43	594.887	6008.96	657.288	6444
511.5	198.225	1490.41	184.769	1592.83	186.817	1448.2	383.031	3064.25	428.227	3148.72	400.732	3205.85	773.68	7814.95	613.614	6198.12	676.283	6630.23
512	200.289	1505.93	187.121	1613.11	188.521	1461.41	390.551	3124.41	437.935	3220.11	409.073	3272.59	795.72	8037.57	631.595	6379.74	695.124	6814.94
512.5	201.969	1518.56	189.648	1634.9	190.126	1473.84	397.865	3182.92	446.701	3284.57	416.47	3331.76	817.153	8254.07	647.276	6538.14	713.325	6993.39
513	203.625	1531.01	191.875	1654.09	191.661	1485.74	405.216	3241.73	455.288	3347.7	423.93	3391.44	837.642	8461.03	661.081	6677.58	730.566	7162.42
513.5	205.159	1542.55	193.482	1667.95	193.442	1499.55	412.42	3299.36	463.643	3409.14	431.84	3454.72	856.779	8654.33	673.559	6803.63	746.08	7314.51
514	206.541	1552.94	194.471	1676.48	194.913	1510.95	418.738	3349.9	471.4	3466.18	439.041	3512.33	875.016	8838.55	684.43	6913.44	760.019	7451.16
514.5	207.845	1562.74	195.282	1683.47	196.175	1520.74	424.008	3392.06	478.044	3515.03	445.12	3560.96	890.862	8998.61	694.474	7014.89	772.226	7570.85
515	209.136	1572.45	196.309	1692.32	197.395	1530.19	428.027	3424.22	483.273	3553.48	449.753	3598.02	904.961	9141.02	703.831	7109.4	782.383	7670.42
515.5	210.996	1586.44	197.446	1702.12	198.633	1539.79	431.284	3450.27	486.981	3580.74	453.344	3626.75	916.293	9255.48	712.701	7199	790.308	7748.11
516	212.984	1601.38	198.772	1713.56	200.307	1552.77	434.134	3473.07	489.509	3599.33	456.599	3652.79	924.067	9334.01	720.266	7275.42	796.369	7807.54
516.5	214.876	1615.61	200.234	1726.15	201.945	1565.47	436.265	3490.12	491.438	3613.52	458.974	3671.8	928.719	9381	724.64	7319.59	800.674	7849.75
517	216.065	1624.55	201.566	1737.64	203.391	1576.67	437.737	3501.9	493.04	3625.29	460.319	3682.55	930.401	9397.99	724.898	7322.2	803.722	7879.63
517.5	216.641	1628.88	202.964	1749.69	204.512	1585.36	438.65	3509.2	494.313	3634.65	460.2	3681.6	929.701	9390.91	722.102	7293.96	805.234	7894.45
518	217.283	1633.71	204.108	1759.55	205.533	1593.28	438.758	3510.07	494.631	3636.99	459.196	3673.57	927.56	9369.29	717.977	7252.29	804.133	7883.66
518.5	217.988	1639.01	205.069	1767.84	206.611	1601.64	438.043	3504.34	493.438	3628.22	458.333	3666.66	923.504	9328.32	714.529	7217.46	800.791	7850.89
519	218.957	1646.3	206.185	1777.46	207.742	1610.41	436.369	3490.95	490.617	3607.48	457.231	3657.85	917.268	9265.33	711.702	7188.91	795.079	7794.89
519.5	220.045	1654.48	207.253	1786.67	208.843	1618.94	433.769	3470.15	486.626	3578.13	455.71	3645.68	909.216	9184	708.03	7151.82	787.867	7724.19
520	221.326	1664.1	208.442	1796.91	209.553	1624.45	430.988	3447.91	482.082	3544.72	452.816	3622.52	898.594	9076.7	702.534	7096.3	779.327	7640.46
520.5	222.608	1673.74	209.419	1805.34	210.027	1628.12	427.978	3423.82	477.929	3514.18	448.756	3590.05	886.506	8954.61	694.212	7012.24	769.101	7540.2
521	223.47	1680.23	210.099	1811.2	210.302	1630.25	424.354	3394.83	473.765	3483.56	444.172	3553.37	873.599	8824.23	684.072	6909.82	758.23	7433.63
521.5	223.962	1683.92	210.615	1815.64	210.326	1630.44	419.945	3359.56	469.09	3449.19	439.46	3515.68	859.304	8679.84	673.202	6800.02	746.369	7317.34
522	224.271	1686.25	210.971	1818.71	210.424	1631.2	414.627	3317.02	463.638	3409.1	434.682	3477.46	844.261	8527.89	662.441	6691.32	734.22	7198.23
522.5	224.86	1690.68	211.347	1821.96	210.839	1634.41	409.522	3276.18	457.219	3361.91	429.173	3433.38	828.168	8365.33	651.869	6584.54	721.69	7075.39
523	225.542	1695.8	211.758	1825.5	211.514	1639.64	404.642	3237.14	450.438	3312.05	423.336	3386.69	811.209	8194.03	640.616	6470.87	709.21	6953.04
523.5	226.304	1701.53	212.148	1828.87	212.487	1647.19	400.014	3200.11	443.313	3259.65	417.291	3338.33	794.713	8027.4	629.081	6354.35	697.05	6833.83
524	226.872	1705.81	212.407	1831.1	213.274	1653.28	395.457	3163.65	436.77	3211.54	411.07	3288.56	777.862	7857.2	616.565	6227.93	684.671	6712.46
524.5	227.035	1707.03	212.393	1830.98	213.602	1655.83	390.672	3125.38	430.618	3166.31	405.045	3240.36	760.057	7677.34	603.428	6095.23	671.979	6588.02
525	227.186	1708.16	212.198	1829.29	213.792	1657.3	385.918	3087.34	424.673	3122.6	398.864	3190.91	742.233	7497.31	590.133	5960.94	658.012	6451.1
525.5	227.215	1708.38	212.128	1828.69	213.44	1654.58	380.97	3047.76	419.2	3082.35	393.062	3144.5	724.755	7320.76	577.578	5834.12	643.499	6308.81
526	227.241	1708.58	212.384	1830.9	212.974	1650.96	375.887	3007.1	413.24	3038.53	387.567	3100.54	708.964	7161.25	566.646	5723.7	629.474	6171.32
526.5	227.195	1708.23	212.87	1835.09	212.719	1648.99	370.499	2963.99	407.012	2992.74	382.25	3058	694.659	7016.75	556.727	5623.51	616.047	6039.68

## Sheet: pPMQAK1-lysate
	pPMQAK1-EV	pPMQAK1-J23101_B0032			pPMQAK1-L21_RBS*
lambda [nm]	EV	BB1	BB2	BB3	L*1	L*2	L*3
505	16.0216	129.691	109.439	98.296	284.492	354.305	330.627
505.5	15.9929	132.579	112.399	106.445	301.979	367.211	351.013
506	15.8378	135.965	115.78	111.963	317.112	380.405	369.173
506.5	15.5929	140.032	119.762	115.136	329.859	394.218	384.729
507	15.2507	144.478	123.936	116.708	340.736	408.64	398.444
507.5	14.9483	148.792	127.858	118.864	351.436	423.093	411.489
508	14.7527	152.93	131.713	121.631	362.716	436.546	424.203
508.5	14.6661	156.964	135.389	124.581	373.85	448.999	436.296
509	14.6194	161.002	138.97	127.953	384.93	460.826	447.381
509.5	14.5856	164.997	142.366	131.354	395.621	472.417	458.131			Fluorescence/Abs600
510	14.546	168.401	145.295	134.854	405.167	484.266	468.422			1	2	3	average	SD	GFP-EV
510.5	14.4479	171.394	147.931	137.469	413.187	495.126	478.251		pMQAK1-EV	13.31	/	/	/	/
511	14.3801	173.945	150.369	139.281	419.57	504.492	487.211		pPMQAK1-J23101_B0032	184.419	158.785	148.092	163.765	18.669	150.455
511.5	14.2616	176.237	152.527	140.886	425.137	512.099	494.601		pPMQAK1-L21_RBS*	444.973	533.884	515.59	498.149	46.9512	484.839
512	14.0877	178.385	154.531	142.093	430.456	517.923	500.862
512.5	13.9316	179.927	156.21	143.846	435.942	522.917	506.09
513	13.7061	181.282	157.434	145.852	440.91	526.764	510.479
513.5	13.5229	182.525	158.296	147.198	444.159	530.024	513.718
514	13.4088	183.619	158.687	148.127	445.538	532.777	515.356
514.5	13.31	184.419	158.785	148.092	444.973	533.884	515.59
515	13.2833	184.131	158.678	147.464	443.511	533.502	514.579
515.5	13.2529	183.028	158.183	146.798	441.661	531.52	512.82
516	13.1876	181.366	157.185	145.429	439.188	528.152	510.48
516.5	13.1152	179.442	155.658	143.925	436.057	524.111	506.979
517	12.9909	177.251	153.895	142.039	431.774	518.887	501.838
517.5	12.867	174.663	152.082	140.005	426.492	512.541	495.433
518	12.7394	172.034	150.344	138.537	420.601	505.406	488.046
518.5	12.6513	169.376	148.132	136.498	413.944	497.255	480.228
519	12.6309	166.653	145.385	134.366	406.358	488.374	472.163
519.5	12.6658	163.648	142.3	131.798	397.71	478.412	463.131
520	12.7129	160.229	139.037	128.893	388.341	467.378	452.877
520.5	12.7163	156.764	136.066	126.354	379.021	455.952	441.99
521	12.6933	153.28	133.083	123.514	369.577	444.641	430.67
521.5	12.6356	149.762	129.957	120.781	359.932	433.556	419.957
522	12.5587	146.083	126.789	117.623	350.067	422.567	409.539
522.5	12.4906	142.126	123.519	113.919	340.063	411.77	399.02
523	12.3989	138.18	120.427	110.141	330.513	400.563	388.746
523.5	12.279	134.504	117.219	106.679	321.254	388.764	377.64
524	12.1758	130.825	113.962	103.737	312.265	376.886	365.977
524.5	12.0571	127.256	110.674	101.063	303.433	365.118	354.116
525	11.9644	123.671	107.474	98.5035	294.597	354.371	342.678
525.5	11.8857	120.174	104.601	95.5553	286.479	344.488	332.469
526	11.804	117.046	101.819	92.62	278.878	335.025	323.42
526.5	11.7806	114.03	99.2726	90.08	271.586	326.109	314.945
527	11.772	111.264	96.7809	87.9433	264.514	317.085	306.551
527.5	11.8809	108.443	94.3426	86.297	257.172	307.741	298.181
528	12.0511	105.598	92.2181	84.7684	249.94	298.244	290.022
528.5	12.2087	103.069	90.1972	83.1774	243.154	289.044	282.61
529	12.3477	100.862	88.3896	81.7417	237.504	281.449	275.553
529.5	12.3246	99.4035	86.6824	80.6515	233.551	276.451	268.85
530	12.2584	98.4004	85.0088	79.935	230.544	273.2	262.292

## Sheet: pSB3K3-lysate
	pSB3K3-EV	pSB3K3-J23101_B0032			pSB3K3-L21_RBS*
lambda [nm]	EV	BB1	BB2	BB3	L*1	L*2	L*3
505	12.9406	143.618	128.225	146.429	434.052	470.686	453.91
505.5	13.3456	152.345	134.736	153.345	453.231	492.055	478.385
506	13.5471	159.232	140.446	159.696	471.6	512.272	500.939
506.5	13.4691	164.582	145.356	165.532	489.886	532.076	521.128
507	13.2126	170	149.608	170.696	507.262	550.713	539.048
507.5	12.9664	177.482	153.959	175.748	524.282	569.895	555.669
508	12.7911	187.007	158.797	180.833	541.107	588.517	571.985
508.5	12.6837	196.654	163.827	186.05	556.932	605.781	588.634
509	12.6247	203.982	168.874	191.084	572.124	622.058	605.453
509.5	12.559	208.457	173.372	195.636	586.541	637.017	622.097			Fluorescence/Abs600
510	12.5061	211.033	177.049	199.587	599.74	652.287	637.863			1	2	3	average	SD	GFP-EV
510.5	12.4108	213.127	180.066	203.132	611.871	666.595	651.601		pMQAK1-EV	11.8021	/	/	/	/
511	12.2675	216.111	182.673	206.589	622.514	679.189	663.534		pPMQAK1-J23101_B0032	221.578	192.947	219.179	211.235	15.8829	199.433
511.5	12.1551	219.003	185.221	209.737	631.64	690.09	673.323		pPMQAK1-L21_RBS*	660.806	719.404	702.909	694.373	30.2172	682.571
512	12.0665	221.287	187.608	212.679	640.327	698.499	681.124
512.5	12.0385	222.304	189.621	215.038	647.908	705.785	687.932
513	12.0669	222.028	191.33	216.783	654.119	711.551	693.385
513.5	12.0693	221.644	192.36	218.106	658.527	715.434	697.836
514	11.9852	221.357	192.868	218.832	660.437	718.008	701.414
514.5	11.8021	221.578	192.947	219.179	660.806	719.404	702.909
515	11.6156	222.101	192.509	219.04	659.316	719.925	702.224
515.5	11.4412	222.789	191.83	218.169	656.089	718.859	699.449
516	11.353	223.935	190.752	216.732	652.098	715.283	694.562
516.5	11.2897	225.183	189.169	214.481	647.226	709.192	688.384
517	11.2166	226.126	187.42	211.724	642.141	700.984	680.949
517.5	11.1708	225.605	185.383	209.115	635.616	691.251	672.099
518	11.0312	223.393	183.035	206.442	626.648	680.61	662.717
518.5	10.9085	219.885	180.301	203.405	615.525	669.645	652.409
519	10.7781	215.635	177.019	199.893	603.023	657.893	641.088
519.5	10.6956	211.267	173.552	195.689	590.626	644.951	629.027
520	10.724	206.477	169.973	191.376	578.854	630.907	615.484
520.5	10.7464	201.311	166.256	187.274	566.9	616.192	601.445
521	10.7111	195.935	162.518	183.088	553.967	601.192	587.164
521.5	10.5837	190.576	158.509	178.881	539.738	586.354	572.318
522	10.4482	185.677	154.33	174.231	524.291	571.035	557.678
522.5	10.3278	180.772	149.95	169.247	509.16	555.386	542.192
523	10.2878	175.839	145.419	164.41	494.784	540.309	526.491
523.5	10.2603	170.732	141.152	159.745	481.169	525.47	511.176
524	10.2695	165.53	137.499	155.393	468.078	511.133	496.4
524.5	10.287	160.704	134.49	151.416	454.661	496.45	483.087
525	10.211	156.138	131.627	147.637	441.362	481.615	470.157
525.5	10.0779	151.937	128.495	143.936	428.32	467.721	457.429
526	9.88553	147.907	124.918	140.456	416.228	454.631	444.667
526.5	9.81156	143.949	121.08	136.933	405.018	442.31	431.622
527		140.131	117.235	133.454	394.367	430.244	419.481
527.5		136.386	113.59	129.858	383.589	418.024	407.785
528		132.813	110.357	126.037	372.461	406.436	396.631
528.5		129.583	107.605	122.576	361.972	395.817	385.941
529		127.163	105.373	119.829	352.553	385.378	375.114
529.5		125.718	103.501	118.187	345.228	375.137	364.694
530		125.079	101.723	117.293	339.006	364.289	354.004

## Sheet: pMJc01-lysate
	pMJc01-EV	pMJc01-J23101_B0032			pMJc01-L21_RBS*
lambda [nm]	EV	BB1	BB2	BB3	L*1	L*2	L*3
505	16.1256	250.635	261.689	269.914	632.992	582.987	594.69
505.5	15.9392	261.01	276.696	280.571	663.143	611.272	622.055
506	15.6749	270.848	290.115	291.603	691.486	638.738	648.343
506.5	15.4348	279.837	301.783	302.935	718	664.703	673.843
507	15.1218	288.918	311.421	314.17	743.141	688.407	698.484
507.5	14.8385	298.279	320.21	324.74	768.388	710.309	722.607
508	14.6014	307.833	329.104	334.721	793.465	731.074	746.514
508.5	14.4056	317.277	338.522	344.538	817.73	751.463	769.534
509	14.2956	325.887	348.74	354.218	840.643	772.49	791.199
509.5	14.2333	333.759	358.973	363.835	862.389	793.524	811.284			Fluorescence/Abs600
510	14.187	341.064	368.165	372.737	882.57	813.273	829.756			1	2	3	average	SD	GFP-EV
510.5	14.0978	347.758	376.026	380.459	901.231	831	846.653		pMQAK1-EV	13.6937	/	/	/	/
511	14.0032	353.956	382.732	386.726	917.663	845.574	861.794		pPMQAK1-J23101_B0032	379.68	407.984	407.162	398.275	16.1095	384.582
511.5	13.8959	359.909	389.003	391.579	931.248	857.718	875.333		pPMQAK1-L21_RBS*	973.926	898.127	918.02	930.024	39.2992	916.331
512	13.8511	365.499	394.865	395.789	942.66	868.026	887.715
512.5	13.8765	370.617	399.661	399.397	951.94	876.765	898.529
513	13.8739	374.621	403.075	402.578	960.362	884.835	907.443
513.5	13.8509	377.365	405.112	404.967	967.432	891.386	913.709
514	13.7946	379.116	406.687	406.42	972.044	896.067	917.171
514.5	13.6937	379.68	407.984	407.162	973.926	898.127	918.02
515	13.6028	379.077	408.565	406.734	972.278	897.488	916.397
515.5	13.4653	376.993	407.998	405.641	968.172	894.113	912.862
516	13.3104	373.386	406.22	403.509	962.458	888.238	907.678
516.5	13.2207	369.014	403.683	400.655	955.03	880.706	900.981
517	13.158	364.526	400.389	397.258	946.037	871.497	892.364
517.5	13.1459	359.922	396.095	392.979	934.922	861.097	881.618
518	13.0959	355.215	390.025	387.749	922.4	849.302	868.65
518.5	12.987	349.816	382.522	381.235	908.527	835.846	854.427
519	12.9191	343.325	374.307	373.645	893.129	820.923	839.558
519.5	12.8765	336.216	366.174	365.451	876.768	804.102	823.753
520	12.9008	328.321	358.49	357.095	858.599	786.207	807.147
520.5	12.8919	320.435	350.489	348.992	839.65	767.657	788.966
521	12.7996	312.671	342.003	340.967	819.502	748.941	769.432
521.5	12.7035	304.997	332.964	332.775	798.223	729.964	748.678
522	12.5906	297.565	323.572	323.983	776.524	710.432	727.353
522.5	12.4952	290.042	314.518	314.596	754.268	690.645	706.408
523	12.3945	282.589	305.635	305.295	732.837	671.062	686.875
523.5	12.281	274.97	296.78	296.45	712.115	652.704	668.613
524	12.1898	267.206	288.149	288.217	692.011	635.058	650.634
524.5	12.1519	259.188	279.553	280.314	672.344	617.384	632.136
525	12.1276	251.329	271.604	272.481	653.153	599.611	612.875
525.5	12.1197	243.858	264.371	265.058	634.595	581.95	594.128
526	12.1034	236.813	257.418	258.041	616.476	565.35	576.845
526.5	12.0883	230.436	250.712	251.301	599.252	549.108	561.125
527		224.275	243.766	244.607	582.505	533.841	546.527
527.5		218.366	236.663	237.837	566.263	519.008	531.868
528		212.655	230.014	231.038	550.297	504.186	517.218
528.5		207.412	224.012	224.697	534.931	490.351	503.186
529		202.735	218.621	218.983	521.789	478.33	489.685
529.5		198.274	213.74	213.797	511.318	470.03	476.826
530		194.062	208.836	208.909	503.205	464.024	464.141
