# Supplementary material for: A chimeric vector for dual use in cyanobacteria and Escherichia coli, tested with cystatin, a nonfluorescent reporter protein
Source: PeerJ. 2021 Nov 3;9:e12199. doi: 10.7717/peerj.12199 (PMC8571960; doi:10.7717/peerj.12199)
Supplement: Supplemental Information 10 — Raw data supporting Figure 4. [file peerj-09-12199-s010.xlsx]

## Sheet: Ecoli
							This data supports Figure 4a.
										MEASUREMENTS - A550
										1	2	3	SD	SD^2	average	EV-C	EV-C SD	Normalization
	0.668						1. exp	pMJC01	EV	0.668	0.633	0.599	0.0345012	0.00119033	0.633333
	0.093								C	0.093	0.083	0.11	0.0136504	0.000186333	0.0953333	0.538	0.0371035	1			1st exp		2nd exp
								pSB3K3	EV	0.598	0.596	0.566	0.0179258	0.000321333	0.586667						A550 (EV-C)	EV-C SD	A550 (EV-C)	EV-C SD
									C	0.341	0.276	0.507*	0.0459619	0.0021125	0.3085	0.278167	0.0493339	0.517038		pMJc01	1	0.037103	1	0.037345
								pPMQAK1	EV	0.59	0.576	0.542	0.0246847	0.000609333	0.569333					pSB3K3	0.517038	0.049334	0.483614	0.092376
									C	0.331	0.28	0.299	0.0257747	0.000664333	0.303333	0.266	0.0356885	0.494424		pPMQAK1	0.494424	0.035688	0.402482	0.037541
							2. exp	pMJC01	EV	1.117	1.117	1.075	0.0264071	0.000697333	1.103
									C	0.05	0.032	0.084	0.0264071	0.000697333	0.0553333	1.04767	0.0373452	1
								pSB3K3	EV	1.186	1.037	1.061	0.0800021	0.00640033	1.09467
									C	0.627	0.6	0.537	0.0461844	0.002133	0.588	0.506667	0.092376	0.483614
								pPMQAK1	EV	1.123	1.162	1.117	0.0244336	0.000597	1.134
									C	0.741	0.712	0.684	0.0285015	0.000812333	0.712333	0.421667	0.0375411	0.402482
												*measurement discarded as an outlier
									EV - empty vector		A550 in positive control sample (only papain with no lysate added in the reaction)
									C - L21_RBS*_cystatin		1. exp	0.686
											2. exp	1.148

## Sheet: Sy6803
This data supports Figure 4c.
		pMJc01		pPMQAKI
		EV	C	EV	C
MEASUREMENTS - A550	1	0.667	0.037	0.601	0.521
	2	0.554	0.041	0.581	0.51
	3	0.536		0.658
	average	0.585667	0.039	0.613333	0.5155
	SD	0.0710094	0.00282843	0.0399541	0.00777817
	EV-C	0.546667		0.0978333
	EV-C SD	0.0710657		0.0407042
		EV - empty vector
		C - L21_RBS*_cystatin
														pMJc01	pPMQAK1
													average	0.546667	0.097833
													SD	0.071066	0.040704

## Sheet: Linearity
This data supports Figure 4b.
		ul of cell lysate	A550				A550
		10	1.39	1.518	1.454	0.0905097	1.113	1.177	1.145	0.0452548	0.309	0.101193
		15	1.549	1.468	1.5085	0.0572756	0.988	0.927	0.9575	0.0431335	0.551	0.0717008
		30	1.274	1.377	1.3255	0.072832	0.571	0.54	0.5555	0.0219203	0.77	0.0760592
			EV1	EV2	AVERAGE	STDEV	C1	C2	AVERAGE	STDEV	EV-C	EV - C STDEV
			Abs550_EV				Abs550_C
