# Supplementary material for: A chimeric vector for dual use in cyanobacteria and Escherichia coli, tested with cystatin, a nonfluorescent reporter protein
Source: PeerJ. 2021 Nov 3;9:e12199. doi: 10.7717/peerj.12199 (PMC8571960; doi:10.7717/peerj.12199)
Supplement: Supplemental Information 11 — Raw data supporting Figure 5A. [file peerj-09-12199-s011.xlsx]

## Sheet: List1
	LYSATES									CULTURES
	pMJc01-EV			pMJC01-J23101_B0032			pMJc01-L21_RBS*			pMJc01-EV			pMJC01-J23101_B0032			pMJc01-L21_RBS*
lambda [nm]	1	2	3	1	2	3	1	2	3	1	2	3	1	2	3	1	2	3
505	38.2338	35.0534	38.5864	52.3682	51.446	50.3216	194.199	184.112	197.272	52.3716	55.6784	53.1318	58.6972	65.006	65.048	169.724	154.23	152.698
505.5	34.6849	32.1797	34.9974	49.0885	47.5895	47.1622	195.842	188.222	197.28	48.4344	50.452	48.2332	54.9336	60.1554	59.6798	170.584	155.885	153.626
506	31.6067	29.6766	31.8166	46.1853	44.4128	44.4703	197.952	192.223	198.237	44.8867	45.9293	43.9417	51.6527	55.9002	55.1836	172.523	158.18	155.362
506.5	29.2896	27.7487	29.3567	43.9875	42.1717	42.5382	201.102	196.348	200.713	41.957	42.4068	40.5806	49.0921	52.6935	51.8448	176.445	161.544	158.338
507	27.7763	26.3666	27.6899	42.5749	40.9488	41.31	205.36	200.504	204.552	39.7932	40.0051	38.1605	47.3824	50.6673	49.7241	181.969	166.331	162.672
507.5	26.8533	25.4606	26.6819	41.7532	40.5094	40.7187	210.271	204.829	209.312	38.1579	38.498	36.6639	46.3422	49.395	48.6842	188.753	172.071	168.002
508	26.2622	24.8074	26.0403	41.4198	40.5674	40.4609	215.529	209.051	214.432	37.0006	37.6002	35.7401	45.8053	48.6729	48.2967	195.994	178.488	174.01
508.5	25.6936	24.2728	25.5774	41.3401	40.6709	40.3153	220.743	213.426	219.387	36.0748	36.8616	35.0094	45.4837	48.2012	48.0698	203.317	185.257	180.224
509	25.1071	23.6857	25.1672	41.3491	40.6888	40.1975	225.526	217.839	223.88	35.2623	36.2	34.375	45.2419	47.9767	47.7868	210.702	192.162	186.375
509.5	24.5682	23.1513	24.7275	41.3288	40.629	40.0729	229.866	222.194	228.064	34.5913	35.5283	33.7387	45.0445	47.8269	47.5841	218.092	198.955	192.451
510	24.0929	22.7124	24.269	41.2898	40.5589	40.0085	233.742	226.298	232.083	34.0295	34.9045	33.1999	44.8718	47.8467	47.4472	225.107	205.46	198.551
510.5	23.7711	22.3621	23.8127	41.2221	40.5307	39.9994	237.295	229.965	235.72	33.5944	34.377	32.6205	44.7469	48.0237	47.2838	232.087	211.797	204.663				Fluorescence intensity [AU]			average [AU]	SD [AU]	GFP-EV [AU]	GFP-EV SD [AU]
511	23.5344	22.0619	23.4489	41.0179	40.5016	40.0232	240.351	233.303	239.144	33.129	33.9133	32.1256	44.6027	48.1555	47.2035	238.954	217.872	210.621		LYSATES	EV	21.6548	20.0233	21.2935	20.9906	0.856909	/	/
511.5	23.3616	21.8045	23.083	40.811	40.498	40.0665	242.998	236.078	242.259	32.6785	33.4894	31.7027	44.5004	48.2995	47.12	245.622	223.629	216.466			J23101_B0032	40.1271	39.7022	39.096	39.6418	0.518173	18.6512	1.0014
512	23.1373	21.6034	22.7657	40.5838	40.4432	40.0406	245.361	238.6	245.258	32.2645	33.0385	31.2923	44.4471	48.2696	47.0408	252.442	229.109	222.135			L21_RBS*	255.811	246.865	254.477	252.384	4.82635	231.394	4.90183
512.5	22.8659	21.346	22.4862	40.4268	40.4029	39.9263	247.514	240.806	248.086	31.8269	32.679	30.9473	44.3933	48.2509	46.8995	259.124	234.423	227.412		CULTURES	EV	29.0692	29.3925	28.0632	28.8416	0.693265	/	/
513	22.5641	21.102	22.2468	40.3205	40.2856	39.7518	249.571	242.763	250.502	31.4457	32.2183	30.5643	44.346	48.1055	46.7669	265.457	239.483	232.154			J23101_B0032	43.0347	45.4567	45.1221	44.5378	1.31244	15.6962	1.48429
513.5	22.2624	20.8165	21.997	40.2795	40.1652	39.5359	251.732	244.512	252.505	31.0999	31.7893	30.2619	44.295	47.8745	46.6484	271.42	244.19	236.535			L21_RBS*	291.889	264.581	255.295	270.588	19.0225	241.747	19.0351
514	22.0535	20.5493	21.7161	40.2651	40.0587	39.3514	253.627	245.851	253.671	30.7883	31.4029	29.9267	44.2454	47.5788	46.4333	276.873	248.525	240.356
514.5	21.8428	20.2976	21.4806	40.1828	39.9076	39.2018	254.991	246.71	254.294	30.5139	31.0764	29.6276	44.0774	47.1544	46.2798	281.323	252.502	243.739
515	21.6548	20.0233	21.2935	40.1271	39.7022	39.096	255.811	246.865	254.477	30.2145	30.8057	29.3629	43.9017	46.8707	46.0955	285.038	256.174	246.692
515.5	21.434	19.7904	21.1323	39.994	39.3821	39.007	255.819	246.685	254.375	29.962	30.526	29.1339	43.6872	46.5643	45.9054	287.77	259.098	249.306
516	21.1863	19.569	20.9342	39.7561	39.0063	38.8777	254.971	245.995	254.165	29.677	30.3229	28.8991	43.4562	46.2728	45.7382	289.693	261.476	251.47
516.5	20.8882	19.3822	20.751	39.4723	38.6058	38.6631	253.64	244.832	253.679	29.4498	30.0225	28.6006	43.2935	46.0005	45.5932	290.813	263.211	253.204
517	20.5996	19.1745	20.5285	39.1433	38.2095	38.3768	251.933	243.356	252.995	29.248	29.7016	28.3265	43.1664	45.735	45.4108	291.607	264.293	254.654
517.5	20.4252	18.9665	20.2403	38.7773	37.933	38.0406	250.026	241.658	251.58	29.0692	29.3925	28.0632	43.0347	45.4567	45.1221	291.889	264.581	255.295
518	20.3523	18.8044	19.9162	38.3746	37.7055	37.7035	247.992	239.7	249.552	28.9323	29.1309	27.8111	42.8399	45.1099	44.7953	291.838	264.177	255.217
518.5	20.3138	18.6588	19.6638	38.0009	37.5405	37.4231	245.642	237.314	246.91	28.7648	28.9405	27.5974	42.5955	44.9364	44.3554	291.497	263.437	254.462
519	20.2763	18.5286	19.5027	37.648	37.3721	37.1373	243.025	234.892	243.591	28.5512	28.8069	27.4417	42.1993	44.7549	43.8254	290.654	261.972	252.946
519.5	20.2234	18.4301	19.4107	37.2521	37.0457	36.8528	239.956	232.188	239.854	28.2874	28.725	27.3033	41.6734	44.5716	43.3258	289.184	259.975	250.835
520	20.0645	18.3495	19.3935	36.8936	36.6588	36.4694	236.382	229.164	235.82	28.055	28.6024	27.1279	41.1679	44.3292	42.977	287.079	257.592	248.456
520.5	19.8155	18.2252	19.3948	36.5555	36.1647	36.017	232.483	225.751	231.806	27.8505	28.5058	26.8976	40.6661	44.0291	42.6619	284.103	254.747	245.959
521	19.5619	18.0604	19.372	36.1857	35.6125	35.4733	228.425	221.953	227.743	27.7236	28.4165	26.7087	40.1537	43.5892	42.3608	280.475	251.56	243.098
521.5	19.3815	17.9202	19.2743	35.7582	35.0301	34.9516	224.264	217.911	223.645	27.6864	28.3531	26.5805	39.7123	43.017	42.07	276.345	247.913	239.762
522	19.3045	17.7829	19.1132	35.2732	34.5062	34.4528	220.225	213.63	219.781	27.7408	28.286	26.5251	39.394	42.4544	41.7014	271.507	244.19	236.261
522.5	19.3121	17.6637	18.9478	34.748	34.0753	33.9932	216.343	209.353	215.88	27.7858	28.2551	26.5585	39.0588	41.9217	41.2201	266.382	240.036	232.214
523	19.3361	17.6069	18.8337	34.2463	33.6134	33.5997	212.107	204.911	211.745	27.7558	28.2237	26.6571	38.7379	41.4925	40.694	261.082	235.506	227.786
523.5	19.3199	17.5769	18.7394	33.8262	33.2146	33.219	207.795	200.553	207.196	27.6561	28.1267	26.7788	38.4675	41.0493	40.36	255.478	230.79	223.328
524	19.2449	17.5807	18.6969	33.4834	32.8281	32.846	203.273	196.15	202.481	27.4517	28.0287	26.8402	38.2289	40.7643	40.0902	249.879	225.735	218.837
524.5	19.0839	17.6237	18.6956	33.1917	32.4277	32.4467	198.299	191.683	197.554	27.2586	27.9547	26.8129	37.9569	40.4406	39.9534	244.449	220.588	214.335
525	18.9182	17.6683	18.7047	32.9019	32.0072	32.1031	193.154	187.176	192.541	27.0926	27.983	26.7307	37.713	40.1017	39.9423	238.693	215.418	209.591
525.5	18.8264	17.7343	18.6751	32.6411	31.6467	31.7983	188.517	182.791	187.956	27.0206	28.005	26.6425	37.4948	39.8186	39.9056	232.97	210.395	204.883
526	18.8803	17.7846	18.6333	32.3289	31.3465	31.5697	183.933	178.582	183.746	27.054	28.1136	26.5675	37.2898	39.5372	39.7692	227.376	205.457	199.881
526.5	19.0212	17.8728	18.6091	31.9639	31.0528	31.3981	179.618	174.384	179.717	27.1696	28.2563	26.5473	37.0731	39.2901	39.4057	221.915	200.567	194.877
527	19.191	17.9596	18.6224	31.6135	30.7708	31.2717	175.527	170.371	175.655	27.335	28.3594	26.6544	36.9488	38.9263	38.9985	216.503	195.974	190.018
527.5	19.3477	18.0441	18.6964	31.3021	30.5158	31.15	171.283	166.427	171.599	27.5173	28.4351	26.8663	36.8877	38.6554	38.5187	211.068	191.355	185.307
528	19.4239	18.1361	18.8204	31.0203	30.2595	30.9845	166.785	162.506	167.353	27.7416	28.467	27.0582	36.8314	38.4212	38.1304	205.257	186.663	180.882
528.5	19.4358	18.1704	18.9225	30.732	30.0537	30.7963	162.568	158.575	162.891	27.9647	28.5566	27.1748	36.6967	38.323	37.9301	199.526	182.022	176.767
529	19.4173	18.1151	18.8679	30.4	30.0182	30.5157	158.397	154.706	158.594	28.1002	28.5674	27.1111	36.261	38.4854	37.8785	194.61	177.554	173.232
529.5	19.4436	17.8493	18.5935	30.0474	30.1911	30.1531	154.488	150.864	154.659	28.1804	28.5837	26.7724	35.5333	38.9983	38.0207	191.56	173.097	170.078
530	19.514	17.4482	18.097	29.6488	30.5998	29.695	150.959	146.996	151.187	28.1871	28.5402	26.1268	34.4149	39.9252	38.2152	190.635	168.637	167.393
530.5	19.6154	16.9154	17.4486	29.2084	31.1408	29.1824	147.504	143.136	147.867	28.1152	28.5128	25.3222	33.0834	41.0285	38.5106	191.052	164.4	165.033
										FLUORESCENCE MEASUREMENTS AT A730=0.1
