# Supplementary material for: A chimeric vector for dual use in cyanobacteria and Escherichia coli, tested with cystatin, a nonfluorescent reporter protein
Source: PeerJ. 2021 Nov 3;9:e12199. doi: 10.7717/peerj.12199 (PMC8571960; doi:10.7717/peerj.12199)
Supplement: Supplemental Information 12 — Raw data supporting Article S1 and Figure 2. [file peerj-09-12199-s012.xlsx]

## Sheet: EV
Abs600	0.695	0.61	0.404	0.281	0.137	0.072			This are the results of F and F/Abs600 values for three technical replicates of dilutions of one E. coli XL1-Blue culture transformed with pMJc01_EV
F	161.843	148.882	119.824	107.466	92.4059	84.4333	3 technical replicates
	160.19	147.947	119.374	106.241	91.8656	84.9002
	162.878	149.483	122.272	107.732	92.2122	84.788
AVERAGE	161.637	148.771	120.49	107.146	92.1612	84.7072
STDEV	1.35575	0.774089	1.55938	0.795309	0.273714	0.243736
F/Abs600	232.572	243.886	298.243	381.304	672.71	1176.49
AVERAGE-F(when Abs600=0, calculated from linear equation)	87.3312	74.4645	46.184	32.8403	17.8552	10.4012	This calculations were ment to account for background absorbance when y=0 and gave more constant values of F/Abs600 (fluorescence per cell) than when this was not taken into consideration, BUT values are very low, even at lower Abs600 values. This approach is probably not correct, as the equation is calculated from fluorescence values that are lower than expected and therefore the calculated F at…
	125.656	122.073	114.317	116.869	130.33	144.461

## Sheet: EV_measurements
	Abs1			Abs2			Abs3			Abs4			Abs5			Abs6
lambda [nm]	1	2	3	1	2	3	1	2	3	1	2	3	1	2	3	1	2	3
505	166.465	164.401	162.979	142.968	146.314	149.255	113.288	115.93	112.858	95.7088	97.5048	97.8544	80.6316	79.7374	78.369	70.5894	69.9294	71.735
505.5	164.064	161.354	162.262	143.648	144.316	147.036	112.139	114.228	113.114	95.7925	96.4073	97.8393	80.2854	79.4573	79.304	70.7635	71.0589	71.565
506	162.221	158.964	161.539	144.018	142.932	145.446	111.314	113.076	113.421	95.9752	95.773	97.8692	80.204	79.4848	80.1447	71.0439	72.0987	71.6888
506.5	161.104	157.541	160.966	144.216	142.277	144.607	111.104	112.561	113.716	96.3006	95.6431	98.0121	80.4229	79.8762	80.8927	71.5206	72.8991	72.2322
507	160.435	157.037	160.538	144.219	142.231	144.314	111.392	112.615	114.068	96.6572	95.9829	98.3348	80.9374	80.5992	81.5963	72.2039	73.5376	73.0994
507.5	159.898	157.088	160.34	144.021	142.548	144.315	111.928	113.097	114.485	97.0309	96.6893	98.86	81.7462	81.3732	82.1283	73.0172	74.2327	74.038
508	159.633	157.22	160.427	144.029	142.808	144.299	112.411	113.499	114.961	97.4111	97.3825	99.5123	82.6489	82.0296	82.6926	73.9106	74.9551	74.8118
508.5	159.765	157.274	160.616	144.271	143.011	144.225	112.857	113.781	115.458	97.8792	98.0464	100.253	83.4755	82.6113	83.3926	74.8929	75.7067	75.4262
509	160.066	157.149	160.841	144.613	143.254	144.305	113.122	114.069	115.907	98.6033	98.7594	101.006	84.2538	83.1492	84.0942	75.8759	76.4911	76.0028
509.5	160.414	156.89	161.037	145.012	143.543	144.681	113.394	114.409	116.28	99.5342	99.4814	101.702	84.973	83.6489	84.6655	76.706	77.2177	76.6732
510	160.578	156.736	161.213	145.524	143.942	145.163	113.7	114.853	116.624	100.478	100.102	102.323	85.5122	84.293	85.2407	77.4392	77.8215	77.4666
510.5	160.615	156.751	161.317	145.92	144.403	145.762	114.072	115.459	116.903	101.347	100.657	102.892	86.011	84.9786	85.6664	78.0278	78.4841	78.2763
511	160.929	156.955	161.526	146.197	144.773	146.393	114.439	116.069	117.234	101.985	101.088	103.366	86.5653	85.6412	86.0458	78.4458	79.1501	78.937
511.5	161.293	157.504	161.722	146.427	145.168	146.909	114.965	116.689	117.775	102.371	101.394	103.709	87.1608	86.3329	86.595	78.8574	79.7496	79.41
512	161.729	158.097	161.932	146.676	145.599	147.284	115.495	117.323	118.339	102.756	101.672	104.004	87.8021	87.068	87.3043	79.3672	80.4368	79.859
512.5	162.26	158.576	162.144	146.876	146.053	147.492	116.072	117.801	118.936	103.185	101.995	104.337	88.3808	87.7608	88.0139	79.8381	81.1562	80.2494
513	162.598	158.958	162.458	147.129	146.471	147.529	116.622	118.246	119.488	103.633	102.357	104.738	88.8732	88.4548	88.7875	80.3426	81.7812	80.7695
513.5	162.95	159.401	162.697	147.324	146.792	147.467	117.237	118.69	119.929	104.168	102.841	105.208	89.2525	89.0591	89.5021	80.924	82.417	81.4077
514	163.001	159.755	162.877	147.313	147	147.488	117.815	118.925	120.233	104.651	103.415	105.797	89.5335	89.4968	90.0437	81.4631	83.0351	82.0015
514.5	162.631	160.176	162.888	147.342	147.177	147.66	118.477	119.018	120.635	104.993	103.947	106.323	89.8108	89.7717	90.4345	82.038	83.4322	82.45
515	162.262	160.549	162.787	147.44	147.35	148.064	119.071	119.086	121.01	105.405	104.453	106.693	90.257	89.9771	90.6995	82.6429	83.7491	82.9416
515.5	161.871	160.769	162.573	147.63	147.605	148.593	119.617	118.967	121.43	105.859	104.964	106.96	90.7388	90.2146	90.9521	83.1613	84.0182	83.3829
516	161.692	160.751	162.564	148.019	147.783	149.036	119.873	118.9	121.803	106.36	105.366	107.202	91.2685	90.6209	91.2496	83.5979	84.2149	83.8665
516.5	161.756	160.555	162.615	148.52	147.885	149.387	119.981	119.06	122.093	106.921	105.783	107.422	91.845	91.1888	91.6446	84.0358	84.4801	84.3567
517	161.843	160.19	162.878	148.882	147.947	149.483	119.824	119.374	122.272	107.466	106.241	107.732	92.4059	91.8656	92.2122	84.4333	84.9002	84.788
517.5	162.052	159.937	163.205	149.134	147.986	149.464	119.593	119.789	122.51	107.82	106.562	108.138	92.9389	92.5097	92.8364	84.8649	85.2679	85.1157
518	162.483	159.751	163.433	149.188	147.912	149.483	119.451	120.319	122.714	108.069	106.739	108.584	93.5088	92.9752	93.4272	85.1927	85.6097	85.5009
518.5	162.923	159.938	163.469	149.102	148.036	149.644	119.539	120.724	122.922	108.256	106.924	109.006	93.9586	93.176	93.921	85.3637	85.9437	85.9087
519	163.35	160.412	163.616	149.12	148.229	149.823	119.675	120.953	123.187	108.425	106.992	109.415	94.2698	93.293	94.1721	85.4896	86.1992	86.3732
519.5	163.625	161.02	163.609	149.476	148.494	150.007	120.076	121.117	123.446	108.608	107.11	109.79	94.4377	93.4334	94.2505	85.5824	86.4014	86.8947
520	163.735	161.531	163.723	149.927	148.844	150.002	120.537	121.299	123.699	108.842	107.383	109.963	94.5221	93.6088	94.2718	85.7737	86.6874	87.2936
520.5	163.976	161.964	164.023	150.48	149.179	149.951	121.017	121.532	124.068	109.017	107.824	110.017	94.6538	93.9158	94.3211	86.212	86.9932	87.5967
521	164.031	162.054	164.35	151.037	149.334	149.918	121.6	121.845	124.411	109.141	108.247	110.059	94.956	94.2826	94.397	86.7419	87.2589	87.8039
521.5	164.085	161.99	164.508	151.316	149.383	150.084	122.114	122.244	124.644	109.23	108.713	110.119	95.3302	94.5029	94.4314	87.1164	87.5514	87.9379
522	164.223	161.835	164.626	151.337	149.417	150.486	122.364	122.64	124.667	109.295	109.003	110.273	95.7291	94.5873	94.436	87.3966	87.8252	88.0722
522.5	164.257	161.636	164.461	151.181	149.508	150.904	122.522	122.874	124.497	109.294	109.064	110.676	95.989	94.6575	94.4145	87.4741	87.9504	88.2238
523	164.195	161.375	164.19	150.913	149.604	151.076	122.489	123.062	124.228	109.26	109.046	111.119	96.0097	94.669	94.5308	87.4832	88.0679	88.331
523.5	163.876	161.137	163.926	150.546	149.679	150.995	122.346	123.055	124.016	109.218	109.178	111.44	95.8814	94.6655	94.8286	87.5499	88.2784	88.5268
524	163.396	160.915	163.613	150.31	149.654	150.541	122.329	122.836	123.872	109.285	109.265	111.626	95.7674	94.7163	95.4528	87.7378	88.5401	88.7008
524.5	163.022	160.805	163.272	150.158	149.475	149.975	122.332	122.562	123.861	109.402	109.442	111.602	95.6795	94.8326	96.1409	87.9142	88.846	88.8235
525	162.92	160.85	163.114	150.135	149.346	149.734	122.296	122.36	123.911	109.624	109.587	111.363	95.6853	94.9426	96.6436	88.1082	89.1823	88.8971
525.5	163.186	161.068	163.085	150.201	149.362	149.788	122.299	122.189	124.066	109.935	109.59	111.109	95.7891	95.1102	96.8146	88.1972	89.3183	88.8753
526	163.703	161.492	163.362	150.507	149.517	150.152	122.247	122.268	124.414	110.154	109.451	110.97	95.9453	95.3346	96.9394	88.3031	89.2599	88.7662
526.5	164.363	162.05	164.025	150.972	149.795	150.86	122.236	122.537	124.904	110.234	109.478	111.019		95.5231	96.9292	88.3518	89.2084	88.7612

## Sheet: GFP
Abs600	0.645	0.54	0.34	0.235	0.122	0.056
F	964.696	855.776	614.168	467.559	268.755	162.746	3 technical replicates
	954.789	842.282	633.732	477.373	274.754	160.134
	971.48	868.656	629.916	476.829	264.499	163.125
AVERAGE	963.655	855.571	625.939	473.92	269.336	162.001
STDEV	8.39377	13.1881	10.3711	5.51544	5.15225	1.62822
F/Abs600	1494.04	1584.39	1841	2016.68	2207.67	2892.88
Fcalc	843.129	713.666	467.07	337.607	198.281	116.904	This was an attempt to use equations for F(Abs600) for calculations of theoretical values, to see whether we achieve more constant values over a range of Abs600 values. Linear equations for EV and GFP were subtracted and thse result used for calculations.
	1307.18	1321.6	1373.74	1436.63	1625.25	2087.57
AVERAGE-F(when Abs600=0, calculated from linear equation)	844.085	736.001	506.369	354.35	149.766	42.4314	Same attempt as with EV
	1308.66	1362.97	1489.32	1507.87	1227.59	757.704
F(EV) at Abs600	152.738	139.548	114.424	101.234	87.0386	78.7477	In this calculations we subtracted calculated fluorescence value of cultures with EV at the same Abs600 values as were used with GFP cultures. The calculated fluorescence per cell values (row 17) had quite constant values in comparison to other two calculations (rows 10 and 13).
	810.917	716.023	511.515	372.687	182.297	83.2537
	1257.24	1325.97	1504.46	1585.9	1494.24	1486.67

## Sheet: GFP_measurements
	Abs1			Abs2			Abs3			Abs4			Abs5			Abs6
lambda [nm]	1	2	3	1	2	3	1	2	3	1	2	3	1	2	3	1	2	3
505	373.841	359.63	376.861	331.028	323.948	337.245	233.707	242.506	245.632	189.506	186.546	183.249	106.23	108.975	111.102	72.9028	72.9598	70.435
505.5	404.467	397.007	406.154	357.916	353.329	361.964	255.12	261.129	261.198	196.765	198.903	198.708	115.787	118.659	116.939	77.6486	76.7508	75.6984
506	434.762	430.196	435.738	384.669	380.178	387.139	274.941	280.384	278.872	208.012	211.529	213.555	124.744	126.852	123.606	81.9319	80.6632	80.5246
506.5	465.056	459.248	466.398	411.093	405.067	413.966	293.093	299.82	299.086	222.641	225.282	227.985	132.9	134.356	131.015	86.0241	84.9696	85.2219
507	495.79	488.223	498.478	437.773	430.63	442.63	310.891	319.599	319.672	237.245	240.767	242.696	140.519	142.563	138.821	90.2869	89.4519	90.0176
507.5	527.797	520.383	531.992	466.899	458.438	472.186	329.246	341.259	340.551	251.711	257.74	258.639	148.058	151.691	146.867	95.1344	94.0357	94.5205
508	560.938	554.213	565.564	497.439	488.147	502.134	349.57	364.152	361.167	267.55	274.716	275.788	156.077	160.777	155.224	100.11	98.6908	98.6869
508.5	594.973	587.169	599.693	528.068	519.257	533.316	371.422	387.078	383.357	285.081	291.028	293.555	165.261	169.957	163.892	105.177	103.609	103.307
509	628.953	619.998	633.498	557.706	550.588	564.598	394.059	408.693	406.049	302.669	307.041	309.982	174.768	179.059	173.057	110.126	108.879	108.874
509.5	662.158	653.748	667.059	588.704	582.115	595.513	416.362	431.648	429.072	319.354	323.961	325.394	183.855	188.011	182.555	115.254	114.485	115.003
510	694.333	687.807	698.977	620.247	613.099	625.822	439.048	456.316	450.883	335.106	341.363	341.535	192.714	197.028	191.942	120.385	119.691	120.783
510.5	725.344	719.113	730.73	651.612	641.956	656.376	460.847	478.839	472.338	350.213	358.371	358.904	201.864	206.059	200.8	125.638	124.281	125.981
511	756.479	748.694	762.369	679.997	667.333	685.326	480.421	496.734	493.256	365.286	373.287	375.582	210.746	214.345	209.63	130.433	128.643	130.645
511.5	786.922	778.561	793.736	706.419	690.531	711.425	497.831	513.722	513.64	379.55	387.015	390.358	218.617	221.837	217.67	134.992	133.549	135.294
512	816.642	810.081	824.183	730.202	713.428	734.336	515.171	532.656	532.865	393.33	400.234	404.258	225.79	229.495	224.669	139.258	138.522	139.74
512.5	844.278	839.866	853.854	752.927	737.538	757.707	533.423	553.201	550.784	406.96	414.421	417.948	233.222	237.836	230.731	143.475	142.952	144.216
513	871.212	865.756	881.931	774.669	761.397	781.489	550.966	570.882	567.932	420.097	428.454	430.583	240.524	246.035	237.544	147.549	146.224	148.217
513.5	894.471	887.268	905.96	796.22	782.787	804.819	566.787	585.413	583.601	431.975	441.409	441.261	246.852	252.966	244.332	151.197	148.973	151.789
514	913.444	905.139	925.758	815.271	799.749	824.293	580.345	597.279	597.641	441.532	451.94	451.427	252.11	258.403	250.311	153.919	151.769	154.273
514.5	928.608	920.441	941.024	830.789	812.838	839.368	592.451	608.772	608.707	449.637	460.433	460.848	256.78	262.869	254.397	156.052	154.973	156.274
515	942.217	933.421	952.707	842.974	823.156	850.134	601.622	619.267	616.571	456.382	466.797	468.648	260.695	266.953	257.81	158.261	158.009	157.961
515.5	953.004	944.366	961.233	852.38	831.774	858.546	608.36	628.253	622.165	461.365	471.439	473.416	263.826	270.301	260.925	160.361	160	159.954
516	960.376	951.619	967.288	857.401	838.151	864.703	611.678	632.643	626.486	464.353	474.776	476	266.097	272.996	263.305	161.764	160.627	161.429
516.5	964.327	954.524	970.834	857.706	841.922	868.313	613.727	634.529	629.835	466.601	476.833	477.069	267.926	274.369	264.6	162.441	160.371	162.603
517	964.696	954.789	971.48	855.776	842.282	868.656	614.168	633.732	629.916	467.559	477.373	476.829	268.755	274.754	264.499	162.746	160.134	163.125
517.5	962.009	952.369	969.997	854.107	838.882	865.776	612.447	631.708	627.405	466.231	475.615	474.527	268.197	273.903	263.92	162.688	159.876	163.063
518	956.355	945.155	965.886	850.068	832.318	859.938	607.189	627.026	622.376	462.664	471.891	470.71	265.778	272.532	263.099	161.624	159.661	162.029
518.5	948.249	933.4	958.486	841.605	823.98	851.776	600.241	622.241	616.691	457.554	466.672	466.287	262.4	270.17	262.266	159.684	159.108	160.472
519	935.101	921.541	945.984	828.643	813.355	841.506	592.592	616.345	608.391	451.954	460.335	461.678	258.528	267.1	259.908	157.554	158.142	158.44
519.5	917.525	909.801	929.22	814.559	800.342	829.532	584.565	607.639	598.17	445.614	453.415	456.35	254.186	262.459	255.801	155.557	156.471	155.991
520	898.484	895.142	909.597	799.157	785.513	815.225	574.943	594.396	587.165	438.583	445.476	448.71	249.382	257.082	250.768	153.487	153.789	153.592
520.5	880.292	875.773	890.329	783.499	770.199	799.228	563.226	580.02	576.436	429.979	436.576	438.881	244.719	252.026	246.042	151.049	150.197	151.245
521	861.8	854.68	871.188	766.612	754.142	781.828	549.844	567.355	564.964	420.152	426.492	428.427	240.378	247.453	241.607	148.508	146.688	149.039
521.5	842.025	831.189	851.588	748.701	736.726	763.935	534.805	555.78	551.464	409.104	415.823	418.918	236.029	242.449	236.445	145.984	143.764	146.173
522	820.821	806.674	829.492	729.482	718.514	744.613	519.309	542.278	536.844	397.789	404.975	409.494	230.92	236.247	231.154	143.641	141.131	143.132
522.5	797.676	783.554	807.072	710.637	700.132	724.163	504.505	526.491	521.174	386.404	394.524	398.954	225.146	230.034	225.55	140.972	138.493	139.992
523	774.515	764.225	784.848	692.695	681.54	703.418	491.25	510.435	505.669	375.951	384.236	387.633	219.119	223.854	219.842	137.828	135.831	137.186
523.5	752.654	746.201	763.685	674.647	662.347	683.02	478.249	495.766	490.901	366.473	374.156	376.23	213.437	218.23	213.53	134.501	133.254	134.383
524	733.115	726.168	741.8	656.07	643.243	662.482	464.701	482.151	477.759	357.116	363.472	364.902	207.75	212.265	207.307	131.113	130.446	131.378
524.5	713.95	704.567	720.111	636.484	624.043	642.533	449.842	468.859	464.744	346.829	352.421	353.75	202.253	206.741	201.593	127.942	127.075	127.753
525	693.71	683.814	698.325	616.222	604.997	624.187	435.485	455.31	450.566	336.133	341.335	343.546	196.704	200.916	195.838	124.92	123.325	124.04
525.5	672.354	665.663	678.093	595.874	586.21	606.939	422.39	441.112	436.184	326.447	331.024	334.196	191.13	195.363	190.513	122.202	119.518	121.033
526	651.834	648.257	658.755	577.645	568.594	590.121	410.846	427.502	423.348	317.295	321.101	324.572	185.798	190.238	185.374	119.302	116.284	118.737
526.5	633.478	630.533	640.545	561.666	552.633	573.124	399.269	414.676	411.747	308.158	311.897	315.271	180.963	185.633	181.206	116.429	113.911	116.638
527	616.038	609.286	621.688	545.396	537.075	556.083	387.438	402.957	399.39	299.294	303.044	306.936	176.882	180.936	176.58	113.626	112.173	114.289
527.5	598.358	587.718	602.793	527.975	521.341	538.532	375.785	390.622	386.425	290.938	295.365	299.24	172.61	175.414	171.927	111.102	110.39	111.622
