# Supplementary material for: A chimeric vector for dual use in cyanobacteria and Escherichia coli, tested with cystatin, a nonfluorescent reporter protein
Source: PeerJ. 2021 Nov 3;9:e12199. doi: 10.7717/peerj.12199 (PMC8571960; doi:10.7717/peerj.12199)
Supplement: Supplemental Information 13 — Raw data supporting Article S1 and Figure 3. [file peerj-09-12199-s013.xlsx]

## Sheet: CellLysateFractions
lambda [nm]	GFP_WCL	EV_WCL	GFP_S	EV_S	GFP_IS	EV_IS		WCL	whole cell lysate
505	279.733	16.9264	265.765	9.1648	19.762	11.455		S	soluble fraction of cell lysate
505.5	290.846	16.2828	278.214	8.92071	19.7293	11.2274		IS	insoluble fraction of cell lysate
506	301.93	15.7015	290.656	8.6862	19.7312	11.0054
506.5	312.899	15.2802	302.761	8.49328	19.7591	10.7562
507	323.558	14.9876	314.455	8.34934	19.7848	10.5305
507.5	334.011	14.7132	325.831	8.27149	19.8405	10.3739
508	344.298	14.479	336.533	8.23735	19.9504	10.272
508.5	354.3	14.2858	346.66	8.20818	20.0859	10.2222
509	363.891	14.126	356.081	8.16768	20.2958	10.2109
509.5	372.95	14.0406	364.651	8.12593	20.5332	10.1809
510	380.913	14.0097	372.402	8.07264	20.6859	10.115
510.5	388.012	13.9508	379.393	8.02879	20.7705	10.0558
511	394.371	13.8584	385.503	7.96549	20.8278	9.9852
511.5	400.041	13.7323	390.967	7.88869	20.797	9.92784
512	405.146	13.6228	395.644	7.81156	20.8	9.88988
512.5	409.561	13.5694	399.29	7.7499	20.8496	9.82673
513	412.83	13.5276	402.133	7.72928	20.8554	9.72332
513.5	414.828	13.4493	404.063	7.76194	20.7987	9.6267
514	415.787	13.3212	404.974	7.78358	20.739	9.51496
514.5	415.782	13.1261	405.129	7.80404	20.6156	9.40071
515	414.848	12.8867	404.418	7.80576	20.5138	9.28795
515.5	413.045	12.7139	402.562	7.7559	20.4682	9.17718
516	410.269	12.5819	399.799	7.67443	20.4142	9.04682
516.5	406.547	12.4991	396.336	7.58779	20.2808	8.9295
517	402.176	12.4235	392.175	7.48808	20.0821	8.83314
517.5	397.272	12.3496	387.557	7.42338	19.7873	8.76669
518	391.688	12.2457	382.266	7.4374	19.4862	8.73091
518.5	385.611	12.1683	376.099	7.52829	19.2571	8.71286
519	378.902	12.1048	368.84	7.63002	19.0962	8.69037
519.5	371.44	12.0559	360.867	7.67798	18.9569	8.66552
520	363.291	12.0085	352.379	7.65603	18.7318	8.61492
520.5	354.549	11.9654	343.971	7.53206	18.3708	8.5523
521	345.484	11.9303	335.538	7.37467	17.9625	8.45779
521.5	336.672	11.8955	326.991	7.26698	17.5732	8.33962
522	328.117	11.893	318.285	7.22146	17.2516	8.21891
522.5	319.802	11.8886	309.35	7.19896	17.0114	8.14388
523	311.321	11.8564	300.201	7.20703	16.7647	8.09177
523.5	302.275	11.7559	291.29	7.16422	16.4662	8.0893
524	292.758	11.6367	282.454	7.09849	16.1296	8.10415
524.5	283.394	11.4904	273.698	7.0241	15.7681	8.09832
525	274.542	11.4092	265.284	6.97373	15.4662	8.04077
525.5	266.616	11.4001	257.229	6.963	15.2736	7.98354
526	259.484	11.4587	249.617	7.02057	15.1009	7.93909
526.5	252.486	11.5379	242.606	7.06939	14.9811	7.96488
527	245.435	11.6548	235.938	7.13806	14.897	8.05544
527.5	238.562	11.7692	229.467	7.19994	14.7894	8.18356
528	231.959	11.8771	223.306	7.26237	14.7098	8.29639
528.5	225.683	11.9582	217.343	7.32589	14.6848	8.38672
529	219.71	11.9504	211.74	7.42363	14.6277	8.44814
529.5	213.947	11.8289	206.582	7.53953	14.549	8.50734
530	208.157	11.6406	201.542	7.6782	14.5006	8.5726
